# Supplementary material
Source: PubMed Central journal article supplement (PMC6393199)
Supplement: NIHMS1006089-supplement-1.pdf [file NIHMS1006089-supplement-1.pdf]

SUPPLEMENTARY DATA

Supplementary Table 1. Main and Sensitivity Analysis I: Matched cohort size before and after the index date.

**Age at diagnosis: 25-44 Years**

| Cohort | Years, Pre and Post Index Date |     |      |      |      |      |      |      |      |      |      |      |      |      |      |      |      |      |      |      |
|--------|--------------------------------|-----|------|------|------|------|------|------|------|------|------|------|------|------|------|------|------|------|------|------|
|        | -10                            | -9  | -8   | -7   | -6   | -5   | -4   | -3   | -2   | -1   | 1    | 2    | 3    | 4    | 5    | 6    | 7    | 8    | 9    | 10   |
| 2003   | 0                              | 0   | 0    | 0    | 0    | 0    | 0    | 0    | 1038 | 1038 | 1038 | 1038 | 1038 | 1038 | 1038 | 1038 | 1038 | 1038 | 1038 | 1038 |
| 2004   | 0                              | 0   | 0    | 0    | 0    | 0    | 0    | 940  | 940  | 940  | 940  | 940  | 940  | 940  | 940  | 940  | 940  | 940  | 940  | 0    |
| 2005   | 0                              | 0   | 0    | 0    | 0    | 0    | 878  | 878  | 878  | 878  | 878  | 878  | 878  | 878  | 878  | 878  | 878  | 878  | 0    | 0    |
| 2006   | 0                              | 0   | 0    | 0    | 0    | 726  | 726  | 726  | 726  | 726  | 726  | 726  | 726  | 726  | 726  | 726  | 726  | 0    | 0    | 0    |
| 2007   | 0                              | 0   | 0    | 0    | 688  | 688  | 688  | 688  | 688  | 688  | 688  | 688  | 688  | 688  | 688  | 688  | 0    | 0    | 0    | 0    |
| 2008   | 0                              | 0   | 0    | 500  | 500  | 500  | 500  | 500  | 500  | 500  | 500  | 500  | 500  | 500  | 500  | 0    | 0    | 0    | 0    | 0    |
| 2009   | 0                              | 0   | 540  | 540  | 540  | 540  | 540  | 540  | 540  | 540  | 540  | 540  | 540  | 540  | 0    | 0    | 0    | 0    | 0    | 0    |
| 2010   | 0                              | 396 | 396  | 396  | 396  | 396  | 396  | 396  | 396  | 396  | 396  | 396  | 396  | 0    | 0    | 0    | 0    | 0    | 0    | 0    |
| 2011   | 346                            | 346 | 346  | 346  | 346  | 346  | 346  | 346  | 346  | 346  | 346  | 346  | 0    | 0    | 0    | 0    | 0    | 0    | 0    | 0    |
| Total  | 346                            | 742 | 1282 | 1782 | 2470 | 3196 | 4074 | 5014 | 6052 | 6052 | 6052 | 6052 | 5706 | 5310 | 4770 | 4270 | 3582 | 2856 | 1978 | 1038 |

**Age at diagnosis: 45-54 Years**

| Cohort | Years, Pre and Post Index Date |      |      |      |       |       |       |       |      |       |       |       |       |       |       |      |       |      |      |      |
|--------|--------------------------------|------|------|------|-------|-------|-------|-------|------|-------|-------|-------|-------|-------|-------|------|-------|------|------|------|
|        | -10                            | -9   | -8   | -7   | -6    | -5    | -4    | -3    | -2   | -1    | 1     | 2     | 3     | 4     | 5     | 6    | 7     | 8    | 9    | 10   |
| 2003   | 0                              | 0    | 0    | 0    | 0     | 0     | 0     | 0     | 2884 | 2884  | 2884  | 2884  | 2884  | 2884  | 2884  | 2884 | 2884  | 2884 | 2884 | 2884 |
| 2004   | 0                              | 0    | 0    | 0    | 0     | 0     | 0     | 3106  | 3106 | 3106  | 3106  | 3106  | 3106  | 3106  | 3106  | 3106 | 3106  | 3106 | 3106 | 0    |
| 2005   | 0                              | 0    | 0    | 0    | 0     | 0     | 2898  | 2898  | 2898 | 2898  | 2898  | 2898  | 2898  | 2898  | 2898  | 2898 | 2898  | 2898 | 0    | 0    |
| 2006   | 0                              | 0    | 0    | 0    | 0     | 2952  | 2952  | 2952  | 2952 | 2952  | 2952  | 2952  | 2952  | 2952  | 2952  | 2952 | 2952  | 2952 | 0    | 0    |
| 2007   | 0                              | 0    | 0    | 0    | 2742  | 2742  | 2742  | 2742  | 2742 | 2742  | 2742  | 2742  | 2742  | 2742  | 2742  | 2742 | 2742  | 0    | 0    | 0    |
| 2008   | 0                              | 0    | 0    | 2230 | 2230  | 2230  | 2230  | 2230  | 2230 | 2230  | 2230  | 2230  | 2230  | 2230  | 2230  | 2230 | 0     | 0    | 0    | 0    |
| 2009   | 0                              | 0    | 2196 | 2196 | 2196  | 2196  | 2196  | 2196  | 2196 | 2196  | 2196  | 2196  | 2196  | 2196  | 0     | 0    | 0     | 0    | 0    | 0    |
| 2010   | 0                              | 1838 | 1838 | 1838 | 1838  | 1838  | 1838  | 1838  | 1838 | 1838  | 1838  | 1838  | 1838  | 0     | 0     | 0    | 0     | 0    | 0    | 0    |
| 2011   | 1632                           | 1632 | 1632 | 1632 | 1632  | 1632  | 1632  | 1632  | 1632 | 1632  | 1632  | 1632  | 0     | 0     | 0     | 0    | 0     | 0    | 0    | 0    |
| Total  | 1632                           | 3470 | 5666 | 7896 | 10638 | 13590 | 16488 | 19594 | 2478 | 22478 | 22478 | 22478 | 20846 | 19008 | 16812 | 4582 | 11840 | 8888 | 5990 | 2884 |

**Age at diagnosis: 55-64 Years**

| Cohort | Years, Pre and Post Index Date |      |      |      |      |       |       |       |       |       |       |       |      |      |      |      |      |     |    |    |
|--------|--------------------------------|------|------|------|------|-------|-------|-------|-------|-------|-------|-------|------|------|------|------|------|-----|----|----|
|        | -10                            | -9   | -8   | -7   | -6   | -5    | -4    | -3    | -2    | -1    | 1     | 2     | 3    | 4    | 5    | 6    | 7    | 8   | 9  | 10 |
| 2003   | 0                              | 0    | 0    | 0    | 0    | 0     | 0     | 0     | 0     | 0     | 0     | 0     | 0    | 0    | 0    | 0    | 0    | 0   | 0  | 0  |
| 2004   | 0                              | 0    | 0    | 0    | 0    | 0     | 0     | 34    | 34    | 34    | 34    | 34    | 34   | 34   | 34   | 34   | 34   | 34  | 34 | 0  |
| 2005   | 0                              | 0    | 0    | 0    | 0    | 0     | 442   | 442   | 442   | 442   | 442   | 442   | 442  | 442  | 442  | 442  | 442  | 442 | 0  | 0  |
| 2006   | 0                              | 0    | 0    | 0    | 0    | 1026  | 1026  | 1026  | 1026  | 1026  | 1026  | 1026  | 1026 | 1026 | 1026 | 1026 | 1026 | 0   | 0  | 0  |
| 2007   | 0                              | 0    | 0    | 0    | 1352 | 1352  | 1352  | 1352  | 1352  | 1352  | 1352  | 1352  | 1352 | 1352 | 1352 | 1352 | 1352 | 0   | 0  | 0  |
| 2008   | 0                              | 0    | 0    | 1764 | 1764 | 1764  | 1764  | 1764  | 1764  | 1764  | 1764  | 1764  | 1764 | 1764 | 1764 | 0    | 0    | 0   | 0  | 0  |
| 2009   | 0                              | 0    | 2108 | 2108 | 2108 | 2108  | 2108  | 2108  | 2108  | 2108  | 2108  | 2108  | 2108 | 2108 | 0    | 0    | 0    | 0   | 0  | 0  |
| 2010   | 0                              | 2194 | 2194 | 2194 | 2194 | 2194  | 2194  | 2194  | 2194  | 2194  | 2194  | 2194  | 2194 | 0    | 0    | 0    | 0    | 0   | 0  | 0  |
| 2011   | 2276                           | 2276 | 2276 | 2276 | 2276 | 2276  | 2276  | 2276  | 2276  | 2276  | 2276  | 2276  | 0    | 0    | 0    | 0    | 0    | 0   | 0  | 0  |
| Total  | 2276                           | 4470 | 6578 | 8342 | 9694 | 10720 | 11162 | 11196 | 11196 | 11196 | 11196 | 11196 | 8920 | 6726 | 4618 | 2854 | 1502 | 476 | 34 | 0  |

SUPPLEMENTARY DATA

**Males**

| Cohort | Years, Pre and Post Index Date |      |      |      |       |       |       |       |       |       |       |       |       |       |       |       |      |      |      |      |   |
|--------|--------------------------------|------|------|------|-------|-------|-------|-------|-------|-------|-------|-------|-------|-------|-------|-------|------|------|------|------|---|
|        | -10                            | -9   | -8   | -7   | -6    | -5    | -4    | -3    | -2    | -1    | 1     | 2     | 3     | 4     | 5     | 6     | 7    | 8    | 9    | 10   |   |
| 2003   | 0                              | 0    | 0    | 0    | 0     | 0     | 0     | 0     | 1936  | 1936  | 1936  | 1936  | 1936  | 1936  | 1936  | 1936  | 1936 | 1936 | 1936 | 1936 |   |
| 2004   | 0                              | 0    | 0    | 0    | 0     | 0     | 0     | 1986  | 1986  | 1986  | 1986  | 1986  | 1986  | 1986  | 1986  | 1986  | 1986 | 1986 | 1986 | 1986 | 0 |
| 2005   | 0                              | 0    | 0    | 0    | 0     | 0     | 2024  | 2024  | 2024  | 2024  | 2024  | 2024  | 2024  | 2024  | 2024  | 2024  | 2024 | 2024 | 2024 | 0    | 0 |
| 2006   | 0                              | 0    | 0    | 0    | 0     | 2318  | 2318  | 2318  | 2318  | 2318  | 2318  | 2318  | 2318  | 2318  | 2318  | 2318  | 2318 | 0    | 0    | 0    | 0 |
| 2007   | 0                              | 0    | 0    | 0    | 2356  | 2356  | 2356  | 2356  | 2356  | 2356  | 2356  | 2356  | 2356  | 2356  | 2356  | 2356  | 0    | 0    | 0    | 0    | 0 |
| 2008   | 0                              | 0    | 0    | 2202 | 2202  | 2202  | 2202  | 2202  | 2202  | 2202  | 2202  | 2202  | 2202  | 2202  | 2202  | 0     | 0    | 0    | 0    | 0    | 0 |
| 2009   | 0                              | 0    | 2358 | 2358 | 2358  | 2358  | 2358  | 2358  | 2358  | 2358  | 2358  | 2358  | 2358  | 2358  | 0     | 0     | 0    | 0    | 0    | 0    | 0 |
| 2010   | 0                              | 2166 | 2166 | 2166 | 2166  | 2166  | 2166  | 2166  | 2166  | 2166  | 2166  | 2166  | 0     | 0     | 0     | 0     | 0    | 0    | 0    | 0    | 0 |
| 2011   | 2098                           | 2098 | 2098 | 2098 | 2098  | 2098  | 2098  | 2098  | 2098  | 2098  | 2098  | 2098  | 0     | 0     | 0     | 0     | 0    | 0    | 0    | 0    | 0 |
| Total  | 2098                           | 4264 | 6622 | 8824 | 11180 | 13498 | 15522 | 17508 | 19444 | 19444 | 19444 | 19444 | 17346 | 15180 | 12822 | 10620 | 8264 | 5946 | 3922 | 1936 |   |

**Females**

| Cohort | Years, Pre and Post Index Date |     |     |     |      |      |      |      |      |      |      |      |      |      |      |      |     |     |     |     |   |
|--------|--------------------------------|-----|-----|-----|------|------|------|------|------|------|------|------|------|------|------|------|-----|-----|-----|-----|---|
|        | -10                            | -9  | -8  | -7  | -6   | -5   | -4   | -3   | -2   | -1   | 1    | 2    | 3    | 4    | 5    | 6    | 7   | 8   | 9   | 10  |   |
| 2003   | 0                              | 0   | 0   | 0   | 0    | 0    | 0    | 0    | 1986 | 1986 | 1986 | 1986 | 1986 | 1986 | 1986 | 1986 | 198 | 198 | 198 | 198 | 6 |
| 2004   | 0                              | 0   | 0   | 0   | 0    | 0    | 0    | 2094 | 2094 | 2094 | 2094 | 2094 | 2094 | 2094 | 2094 | 2094 | 209 | 209 | 209 | 0   | 6 |
| 2005   | 0                              | 0   | 0   | 0   | 0    | 0    | 2194 | 2194 | 2194 | 2194 | 2194 | 2194 | 2194 | 2194 | 2194 | 2194 | 219 | 219 | 0   | 0   | 4 |
| 2006   | 0                              | 0   | 0   | 0   | 0    | 2386 | 2386 | 2386 | 2386 | 2386 | 2386 | 2386 | 2386 | 2386 | 2386 | 2386 | 238 | 6   | 0   | 0   | 0 |
| 2007   | 0                              | 0   | 0   | 0   | 2426 | 2426 | 2426 | 2426 | 2426 | 2426 | 2426 | 2426 | 2426 | 2426 | 2426 | 2426 | 242 | 0   | 0   | 0   | 0 |
| 2008   | 0                              | 0   | 0   | 2   | 2292 | 2292 | 2292 | 2292 | 2292 | 2292 | 2292 | 2292 | 2292 | 2292 | 2292 | 229  | 0   | 0   | 0   | 0   | 0 |
| 2009   | 0                              | 0   | 6   | 6   | 2486 | 2486 | 2486 | 2486 | 2486 | 2486 | 2486 | 2486 | 2486 | 2486 | 0    | 0    | 0   | 0   | 0   | 0   | 0 |
| 2010   | 0                              | 2   | 2   | 2   | 2262 | 2262 | 2262 | 2262 | 2262 | 2262 | 2262 | 2262 | 2262 | 0    | 0    | 0    | 0   | 0   | 0   | 0   | 0 |
| 2011   | 6                              | 6   | 6   | 6   | 2156 | 2156 | 2156 | 2156 | 2156 | 2156 | 2156 | 2156 | 0    | 0    | 0    | 0    | 0   | 0   | 0   | 0   | 0 |
| Total  | 6                              | 441 | 690 | 919 | 1162 | 1400 | 1620 | 1829 | 2028 | 2028 | 2028 | 2028 | 1812 | 1586 | 1337 | 1108 | 866 | 627 | 408 | 198 | 6 |

**Note:**

Control Cohort: People not diagnosed with diabetes *during the study period.*

SUPPLEMENTARY DATA

Supplementary Table 2. Main and Sensitivity Analysis I: Summary statistics of matched cohort samples in the year of matching.

| Variable          | All                           |      |                              |      | Male                         |      |                             |      | Female                        |      |                              |      |
|-------------------|-------------------------------|------|------------------------------|------|------------------------------|------|-----------------------------|------|-------------------------------|------|------------------------------|------|
|                   | Diabetes Cohort<br>(n=19,863) |      | Control Cohort<br>(n=19,863) |      | Diabetes Cohort<br>(n=9,722) |      | Control Cohort<br>(n=9,722) |      | Diabetes Cohort<br>(n=10,141) |      | Control Cohort<br>(n=10,141) |      |
|                   | Mean                          | SE   | Mean                         | SE   | Mean                         | SE   | Mean                        | SE   | Mean                          | SE   | Mean                         | SE   |
| Age, Years (Mean) | 50.67                         | 0.04 | 50.67                        | 0.04 | 50.69                        | 0.06 | 50.69                       | 0.06 | 50.65                         | 0.06 | 50.65                        | 0.06 |
| Female, %         | 51.05                         | 0.35 | 51.05                        | 0.35 |                              |      |                             |      |                               |      |                              |      |
| Metro, %          | 70.89                         | 0.32 | 70.89                        | 0.32 | 72.96                        | 0.45 | 72.96                       | 0.45 | 68.91                         | 0.46 | 68.9                         | 0.46 |
| Census Region, %: |                               |      |                              |      |                              |      |                             |      |                               |      |                              |      |
| Northeast         | 3.66                          | 0.13 | 3.66                         | 0.13 | 4.31                         | 0.21 | 4.31                        | 0.21 | 3.03                          | 0.17 | 3.03                         | 0.17 |
| Midwest           | 37.32                         | 0.34 | 37.32                        | 0.34 | 40.32                        | 0.5  | 40.32                       | 0.5  | 34.44                         | 0.47 | 34.44                        | 0.47 |
| South             | 44.11                         | 0.35 | 44.11                        | 0.35 | 38.81                        | 0.49 | 38.81                       | 0.49 | 49.19                         | 0.5  | 49.2                         | 0.5  |
| West              | 14.87                         | 0.25 | 14.87                        | 0.25 | 16.49                        | 0.38 | 16.49                       | 0.38 | 13.31                         | 0.34 | 13.31                        | 0.34 |
| PPO,%             | 58.51                         | 0.35 | 58.51                        | 0.35 | 61.27                        | 0.49 | 61.27                       | 0.49 | 55.86                         | 0.49 | 55.86                        | 0.49 |

| Variable          | Aged: 25-44 Years            |      |                             |      | Aged: 45-54 Years             |      |                              |      | Aged: 55-64 Years            |      |                             |      |
|-------------------|------------------------------|------|-----------------------------|------|-------------------------------|------|------------------------------|------|------------------------------|------|-----------------------------|------|
|                   | Diabetes Cohort<br>(n=3,026) |      | Control Cohort<br>(n=3,026) |      | Diabetes Cohort<br>(n=11,239) |      | Control Cohort<br>(n=11,239) |      | Diabetes Cohort<br>(n=5,598) |      | Control Cohort<br>(n=5,598) |      |
|                   | Mean                         | SE   | Mean                        | SE   | Mean                          | SE   | Mean                         | SE   | Mean                         | SE   | Mean                        | SE   |
| Age, Years (Mean) | 40.11                        | 0.06 | 40.11                       | 0.06 | 50.31                         | 0.03 | 50.31                        | 0.03 | 57.1                         | 0.02 | 57.1                        | 0.02 |
| Female, %         | 53.60                        | 0.91 | 53.60                       | 0.91 | 50.32                         | 0.47 | 50.32                        | 0.47 | 51.16                        | 0.67 | 51.16                       | 0.67 |
| Metro, %          | 62.49                        | 0.88 | 62.49                       | 0.88 | 71.68                         | 0.43 | 71.68                        | 0.43 | 73.85                        | 0.59 | 73.83                       | 0.59 |
| Census Region, %: |                              |      |                             |      |                               |      |                              |      |                              |      |                             |      |
| Northeast         | 2.51                         | 0.28 | 2.51                        | 0.28 | 3.70                          | 0.18 | 3.70                         | 0.18 | 4.18                         | 0.27 | 4.18                        | 0.27 |
| Midwest           | 31.10                        | 0.84 | 31.10                       | 0.84 | 38.66                         | 0.46 | 38.66                        | 0.46 | 38                           | 0.65 | 38                          | 0.65 |
| South             | 51.82                        | 0.91 | 51.82                       | 0.91 | 43.46                         | 0.47 | 43.46                        | 0.47 | 41.23                        | 0.66 | 41.23                       | 0.66 |
| West              | 14.51                        | 0.64 | 14.51                       | 0.64 | 14.13                         | 0.33 | 14.13                        | 0.33 | 16.54                        | 0.5  | 16.54                       | 0.5  |
| PPO,%             | 56.77                        | 0.90 | 56.77                       | 0.90 | 58.66                         | 0.46 | 58.66                        | 0.46 | 59.15                        | 0.66 | 59.15                       | 0.66 |

**Notes:**

Control Cohort: People not diagnosed with diabetes *during the study period*.

Aged= age at diagnosis.

The testing of balance propensity score matching shows that the % biases for each covariates after matching in each year were less than 1%. Metro= residence in Metropolitan statistical area; PPO= Preferred Provider Organization; SE= Standard error.

SUPPLEMENTARY DATA

Supplementary Table 3. Main Analysis: Estimated per capita annual and cumulative excess medical expenditures during the 10 years before and after the index date (2013\$)

| Follow-up Year                | Annual medical expenditures |     |                |     |        |     |       | Cumulative medical expenditures |                |        |      |
|-------------------------------|-----------------------------|-----|----------------|-----|--------|-----|-------|---------------------------------|----------------|--------|------|
|                               | Diabetes Cohort             | SE  | Control Cohort | SE  | Excess | SE  | %     | Diabetes Cohort                 | Control Cohort | Excess | %    |
| -10                           | 4,722                       | 237 | 3,679          | 165 | 1,043  | 289 | 28.4  | 4,722                           | 3,679          | 1,043  | 28.4 |
| -9                            | 5,382                       | 216 | 4,129          | 147 | 1,253  | 262 | 30.3  | 10,104                          | 7,809          | 2,296  | 29.4 |
| -8                            | 5,477                       | 154 | 4,351          | 126 | 1,126  | 199 | 25.9  | 15,581                          | 12,160         | 3,421  | 28.1 |
| -7                            | 5,781                       | 130 | 4,475          | 105 | 1,306  | 167 | 29.2  | 21,362                          | 16,635         | 4,727  | 28.4 |
| -6                            | 6,120                       | 128 | 4,674          | 114 | 1,446  | 171 | 30.9  | 27,482                          | 21,309         | 6,173  | 29.0 |
| -5                            | 6,475                       | 125 | 4,785          | 95  | 1,690  | 157 | 35.3  | 33,957                          | 26,093         | 7,863  | 30.1 |
| -4                            | 6,856                       | 125 | 4,933          | 102 | 1,923  | 161 | 39.0  | 40,812                          | 31,026         | 9,786  | 31.5 |
| -3                            | 7,084                       | 116 | 5,021          | 88  | 2,064  | 146 | 41.1  | 47,897                          | 36,047         | 11,850 | 32.9 |
| -2                            | 7,500                       | 115 | 5,110          | 94  | 2,390  | 148 | 46.8  | 55,397                          | 41,157         | 14,240 | 34.6 |
| -1                            | 9,586                       | 204 | 5,094          | 81  | 4,492  | 219 | 88.2  | 64,982                          | 46,251         | 18,732 | 40.5 |
| 1                             | 13,727                      | 213 | 5,618          | 124 | 8,109  | 247 | 144.3 | 78,710                          | 51,869         | 26,841 | 51.7 |
| 2                             | 9,985                       | 152 | 5,724          | 115 | 4,261  | 190 | 74.4  | 88,695                          | 57,593         | 31,102 | 54.0 |
| 3                             | 9,914                       | 165 | 5,696          | 116 | 4,217  | 202 | 74.0  | 98,608                          | 63,289         | 35,319 | 55.8 |
| 4                             | 9,608                       | 169 | 5,622          | 128 | 3,985  | 212 | 70.9  | 108,216                         | 68,912         | 39,304 | 57.0 |
| 5                             | 9,845                       | 203 | 5,695          | 137 | 4,150  | 245 | 72.9  | 118,061                         | 74,607         | 43,455 | 58.2 |
| 6                             | 9,877                       | 219 | 5,515          | 172 | 4,362  | 278 | 79.1  | 127,938                         | 80,122         | 47,816 | 59.7 |
| 7                             | 10,751                      | 363 | 5,824          | 189 | 4,927  | 409 | 84.6  | 138,689                         | 85,946         | 52,743 | 61.4 |
| 8                             | 10,733                      | 413 | 5,428          | 200 | 5,305  | 459 | 97.7  | 149,422                         | 91,374         | 58,048 | 63.5 |
| 9                             | 10,700                      | 408 | 5,733          | 388 | 4,967  | 563 | 86.6  | 160,122                         | 97,107         | 63,015 | 64.9 |
| 10                            | 11,886                      | 751 | 5,724          | 377 | 6,162  | 840 | 107.6 | 172,008                         | 102,831        | 69,177 | 67.3 |
| Annual and cumulative average |                             |     |                |     |        |     |       |                                 |                |        |      |
| Before the index date         | 6,498                       |     | 4,625          |     | 1,873  |     |       | 64,982                          | 46,251         | 18,732 |      |
| After the index date          | 10,703                      |     | 5,658          |     | 5,044  |     |       | 107,025                         | 56,581         | 50,445 |      |
| Difference                    | 4,204                       |     | 1,033          |     | 3,171  |     |       | 42,043                          | 10,330         | 31,713 |      |
| Ratio                         | 1.6                         |     | 1.2            |     | 2.7    |     |       | 1.6                             | 1.2            | 2.7    |      |

**Notes:**

Diabetes Cohort: The follow-up Year 1 *includes* outpatient or inpatient expenditures on diagnosis day.

Control Cohort: People not diagnosed with diabetes *during the study period*.

Excess= Average expenditures for diabetes cohort – average expenditures for control cohort. %= Percent more for diabetes cohort compared to control cohort. SE=standard error around the mean. The excess expenditures are all statically significant (p<0.05, paired Student t-test).

SUPPLEMENTARY DATA

Supplementary Table 4. Main Analysis: Estimated per capita total medical expenditures by components and follow-up years before and after the index date (2013\$).

| Follow-up Year        | Outpatient      |     |                |     |        |     | Inpatient       |     |                |     |        |     | Prescription Drugs |     |                |    |        |     |
|-----------------------|-----------------|-----|----------------|-----|--------|-----|-----------------|-----|----------------|-----|--------|-----|--------------------|-----|----------------|----|--------|-----|
|                       | Diabetes Cohort | SE  | Control Cohort | SE  | Excess | SE  | Diabetes Cohort | SE  | Control Cohort | SE  | Excess | SE  | Diabetes Cohort    | SE  | Control Cohort | SE | Excess | SE  |
| -10                   | 2,521           | 131 | 2,178          | 101 | 343    | 166 | 971             | 157 | 608            | 89  | 363    | 181 | 1,231              | 49  | 893            | 44 | 337    | 66  |
| -9                    | 2,720           | 90  | 2,435          | 87  | 285    | 125 | 1,283           | 157 | 704            | 82  | 579    | 177 | 1,379              | 37  | 990            | 44 | 389    | 58  |
| -8                    | 2,813           | 76  | 2,492          | 71  | 321    | 104 | 1,093           | 101 | 813            | 75  | 280    | 126 | 1,571              | 36  | 1,046          | 34 | 525    | 50  |
| -7                    | 2,990           | 70  | 2,646          | 64  | 345    | 95  | 1,116           | 81  | 765            | 61  | 351    | 101 | 1,674              | 32  | 1,064          | 25 | 610    | 41  |
| -6                    | 3,139           | 66  | 2,756          | 61  | 383    | 89  | 1,225           | 84  | 815            | 78  | 410    | 115 | 1,756              | 29  | 1,103          | 23 | 653    | 37  |
| -5                    | 3,294           | 64  | 2,876          | 58  | 417    | 87  | 1,343           | 87  | 740            | 55  | 603    | 103 | 1,838              | 28  | 1,168          | 22 | 670    | 36  |
| -4                    | 3,503           | 62  | 2,948          | 58  | 555    | 85  | 1,432           | 87  | 781            | 61  | 651    | 106 | 1,921              | 27  | 1,204          | 21 | 718    | 35  |
| -3                    | 3,691           | 61  | 2,985          | 54  | 706    | 81  | 1,394           | 78  | 822            | 52  | 572    | 93  | 1,999              | 25  | 1,214          | 21 | 785    | 33  |
| -2                    | 3,821           | 56  | 3,033          | 52  | 789    | 76  | 1,572           | 79  | 841            | 59  | 731    | 99  | 2,106              | 26  | 1,236          | 21 | 870    | 33  |
| -1                    | 4,784           | 73  | 3,089          | 52  | 1,695  | 90  | 2,532           | 170 | 724            | 40  | 1,808  | 175 | 2,270              | 28  | 1,281          | 24 | 989    | 37  |
| 1                     | 5,905           | 93  | 3,343          | 67  | 2,561  | 115 | 4,611           | 157 | 973            | 72  | 3,638  | 173 | 3,212              | 33  | 1,302          | 26 | 1,910  | 42  |
| 2                     | 4,991           | 87  | 3,400          | 63  | 1,591  | 108 | 2,003           | 94  | 1,008          | 75  | 995    | 120 | 2,991              | 36  | 1,316          | 27 | 1,675  | 44  |
| 3                     | 4,860           | 95  | 3,418          | 75  | 1,442  | 121 | 2,109           | 100 | 964            | 59  | 1,145  | 117 | 2,944              | 36  | 1,315          | 29 | 1,630  | 47  |
| 4                     | 4,759           | 103 | 3,360          | 85  | 1,399  | 134 | 1,909           | 91  | 973            | 62  | 936    | 111 | 2,940              | 39  | 1,290          | 30 | 1,650  | 49  |
| 5                     | 4,787           | 119 | 3,345          | 88  | 1,442  | 148 | 2,064           | 116 | 1,075          | 77  | 988    | 139 | 2,995              | 46  | 1,276          | 30 | 1,719  | 55  |
| 6                     | 4,789           | 120 | 3,342          | 112 | 1,447  | 164 | 1,998           | 131 | 943            | 94  | 1055   | 161 | 3,089              | 56  | 1,230          | 32 | 1,859  | 65  |
| 7                     | 5,031           | 151 | 3,371          | 98  | 1,660  | 180 | 2,613           | 291 | 1,239          | 118 | 1,373  | 314 | 3,107              | 62  | 1,214          | 39 | 1,893  | 73  |
| 8                     | 4,934           | 198 | 3,134          | 104 | 1,800  | 224 | 2,624           | 312 | 1,086          | 135 | 1,539  | 340 | 3,174              | 74  | 1,208          | 44 | 1,966  | 86  |
| 9                     | 4,813           | 198 | 3,272          | 147 | 1,541  | 246 | 2,661           | 273 | 1,306          | 331 | 1,355  | 429 | 3,226              | 92  | 1,155          | 55 | 2,071  | 107 |
| 10                    | 5,314           | 346 | 3,449          | 261 | 1,865  | 434 | 3,148           | 531 | 1,031          | 175 | 2,118  | 559 | 3,423              | 237 | 1,245          | 95 | 2,178  | 256 |
| Annual Average        |                 |     |                |     |        |     |                 |     |                |     |        |     |                    |     |                |    |        |     |
| Before the index date | 3,328           |     | 2744           |     | 584    |     | 1,396           |     | 761            |     | 635    |     | 1,775              |     | 1,120          |    | 655    |     |
| After the index date  | 5,018           |     | 3,343          |     | 1,675  |     | 2,574           |     | 1,060          |     | 1,514  |     | 3,110              |     | 1,255          |    | 1,855  |     |
| Difference            | 1,691           |     | 600            |     | 1,091  |     | 1,178           |     | 299            |     | 879    |     | 1,336              |     | 135            |    | 1,201  |     |
| Ratio                 | 1.5             |     | 1.2            |     | 2.9    |     | 1.8             |     | 1.4            |     | 2.4    |     | 1.8                |     | 1.1            |    | 2.8    |     |

**Notes:**

Diabetes Cohort: The follow-up Year 1 *includes* outpatient or inpatient expenditures on diagnosis day.

Control Cohort: People not diagnosed with diabetes *during the study period*.

Excess= Average expenditures for diabetes cohort – average expenditures for control cohort.

## SUPPLEMENTARY DATA

%= Percent more for diabetes cohort compared to control cohort. SE=standard error around the mean. The excess expenditures are all statically significant ( $p < 0.05$ , paired Student t-test), except <sup>NS</sup>=not significant at  $p < 0.05$ .

SUPPLEMENTARY DATA

Supplementary Table 5. Main analysis: Estimated per capita total medical expenditures by age group and follow-up years before and after the index date (2013\$).

| Follow-up Year        | Aged: 25-44 Years |       |                |     |                   |       | Aged: 45-54 Years |     |                |     |        |       | Aged: 55-64 Years |       |                |     |        |       |
|-----------------------|-------------------|-------|----------------|-----|-------------------|-------|-------------------|-----|----------------|-----|--------|-------|-------------------|-------|----------------|-----|--------|-------|
|                       | Diabetes Cohort   | SE    | Control Cohort | SE  | Excess            | SE    | Diabetes Cohort   | SE  | Control Cohort | SE  | Excess | SE    | Diabetes Cohort   | SE    | Control Cohort | SE  | Excess | SE    |
| -10                   | 3,743             | 826   | 2,108          | 312 | 1,635             | 883   | 4,404             | 320 | 2,974          | 223 | 1,430  | 390   | 5,100             | 357   | 4,359          | 263 | 740    | 443   |
| -9                    | 3,574             | 336   | 3,818          | 517 | 244 <sup>NS</sup> | 616   | 4,113             | 192 | 3,356          | 234 | 757    | 303   | 6,668             | 387   | 4,623          | 270 | 2,044  | 472   |
| -8                    | 3,450             | 272   | 2,818          | 217 | 632               | 348   | 4,961             | 205 | 3,597          | 173 | 1,364  | 268   | 6,317             | 255   | 4,798          | 189 | 1,519  | 318   |
| -7                    | 4,060             | 278   | 3,271          | 276 | 790               | 392   | 5,282             | 180 | 3,647          | 127 | 1,635  | 220   | 6,620             | 213   | 5,166          | 175 | 1,454  | 276   |
| -6                    | 4,596             | 300   | 3,227          | 267 | 1,368             | 402   | 5,482             | 171 | 3,872          | 124 | 1,610  | 211   | 7,209             | 221   | 5,285          | 159 | 1,923  | 272   |
| -5                    | 4,806             | 251   | 3,651          | 244 | 1,155             | 350   | 6,047             | 169 | 4,025          | 98  | 2,023  | 196   | 7,514             | 226   | 5,881          | 204 | 1,633  | 304   |
| -4                    | 5,046             | 282   | 3,336          | 194 | 1,710             | 342   | 6,722             | 182 | 4,297          | 109 | 2,425  | 212   | 7,713             | 206   | 5,896          | 168 | 1,817  | 266   |
| -3                    | 4,983             | 206   | 3,431          | 160 | 1,552             | 261   | 6,873             | 148 | 4,579          | 107 | 2,293  | 183   | 8,396             | 249   | 5,896          | 164 | 2,500  | 298   |
| -2                    | 6,269             | 356   | 3,683          | 194 | 2,586             | 405   | 7,221             | 135 | 4,977          | 135 | 2,244  | 191   | 8,725             | 235   | 6,318          | 219 | 2,407  | 321   |
| -1                    | 7,132             | 264   | 3,347          | 143 | 3,785             | 300   | 9,152             | 215 | 4,946          | 106 | 4,206  | 240   | 11,784            | 560   | 6,974          | 321 | 4,810  | 645   |
| 1                     | 11,522            | 486   | 3,702          | 196 | 7,820             | 523   | 13,213            | 245 | 5,271          | 123 | 7,942  | 274   | 15,951            | 512   | 6,844          | 241 | 9,107  | 566   |
| 2                     | 7,947             | 270   | 4,188          | 261 | 3,759             | 376   | 9,894             | 195 | 5,366          | 141 | 4,528  | 241   | 11,269            | 338   | 7,124          | 309 | 4,144  | 458   |
| 3                     | 8,111             | 306   | 3,910          | 194 | 4,201             | 363   | 10,137            | 225 | 5,512          | 146 | 4,625  | 268   | 10,544            | 341   | 6,932          | 304 | 3,611  | 457   |
| 4                     | 8,289             | 359   | 4,194          | 219 | 4,094             | 421   | 9,779             | 225 | 5,553          | 158 | 4,226  | 275   | 10,165            | 357   | 6,779          | 261 | 3,385  | 442   |
| 5                     | 8,615             | 379   | 4,066          | 213 | 4,549             | 434   | 10,044            | 264 | 5,781          | 175 | 4,263  | 317   | 10,393            | 499   | 6,807          | 359 | 3,586  | 614   |
| 6                     | 9,308             | 577   | 4,077          | 225 | 5,232             | 619   | 9,859             | 251 | 5,705          | 208 | 4,154  | 326   | 10,819            | 620   | 7,360          | 609 | 3,458  | 869   |
| 7                     | 9,483             | 660   | 4,408          | 292 | 5,075             | 722   | 11,311            | 469 | 6,090          | 245 | 5,221  | 529   | 9,359             | 770   | 7,074          | 986 | 2,285  | 1,251 |
| 8                     | 10,634            | 1,232 | 4,079          | 301 | 6,555             | 1,268 | 10,810            | 401 | 5,785          | 251 | 5,025  | 472   | 9,887             | 1,357 | 6,392          | 910 | 3,495  | 1,634 |
| 9                     | 9,785             | 683   | 4,622          | 444 | 5,163             | 815   | 11,021            | 496 | 6,189          | 499 | 4,832  | 704   |                   |       |                |     |        |       |
| 10                    | 10,614            | 1,171 | 4,832          | 765 | 5,782             | 1,398 | 12,344            | 930 | 6,045          | 432 | 6,298  | 1,025 |                   |       |                |     |        |       |
| Annual average        |                   |       |                |     |                   |       |                   |     |                |     |        |       |                   |       |                |     |        |       |
| Before the index date | 4,766             |       | 3,269          |     | 1,546             |       | 6,026             |     | 4,027          |     | 1,999  |       | 7,604             |       | 5,520          |     | 2,085  |       |
| After the index date  | 9,431             |       | 4,208          |     | 5,223             |       | 10,841            |     | 5,730          |     | 5,112  |       | 11,048            |       | 6,914          |     | 4,134  |       |
| Difference            | 4,665             |       | 939            |     | 3,677             |       | 4,816             |     | 1,703          |     | 3,113  |       | 3,444             |       | 1,395          |     | 2,049  |       |
| Ratio                 | 2.0               |       | 1.3            |     | 3.4               |       | 1.8               |     | 1.4            |     | 2.6    |       | 1.5               |       | 1.3            |     | 2.0    |       |

Notes:

Diabetes Cohort: The follow-up Year 1 *includes* outpatient or inpatient expenditures on diagnosis day.

Control Cohort: People not diagnosed with diabetes *during the study period*.

## SUPPLEMENTARY DATA

Excess= Average expenditures for diabetes cohort – average expenditures for control cohort.

%= Percent more for diabetes cohort compared to control cohort. The excess expenditures are all statically significant ( $p < 0.05$ , paired Student t-test), except <sup>NS</sup>=not significant at  $p < 0.05$ .



SUPPLEMENTARY DATA

Supplementary Table 6. Main Analysis: Estimated per capita total medical expenditures by sex and follow-up years before and after the index date (2013\$).

| Follow-up Year        | Males           |       |                |     |        |       | Females         |     |                |     |        |     |
|-----------------------|-----------------|-------|----------------|-----|--------|-------|-----------------|-----|----------------|-----|--------|-----|
|                       | Diabetes Cohort | SE    | Control Cohort | SE  | Excess | SE    | Diabetes Cohort | SE  | Control Cohort | SE  | Excess | SE  |
| -10                   | 4,078           | 347   | 2,921          | 216 | 1,157  | 409   | 5,349           | 322 | 4,408          | 247 | 942    | 406 |
| -9                    | 4,744           | 299   | 3,375          | 213 | 1,369  | 367   | 5,998           | 311 | 4,862          | 204 | 1,136  | 372 |
| -8                    | 4,490           | 166   | 3,464          | 162 | 1,027  | 232   | 6,423           | 254 | 5,192          | 192 | 1,231  | 318 |
| -7                    | 4,909           | 182   | 3,670          | 136 | 1,239  | 227   | 6,617           | 184 | 5,245          | 158 | 1,372  | 242 |
| -6                    | 5,122           | 164   | 3,793          | 151 | 1,329  | 223   | 7,080           | 194 | 5,501          | 167 | 1,579  | 256 |
| -5                    | 5,591           | 174   | 3,972          | 136 | 1,618  | 221   | 7,327           | 179 | 5,572          | 132 | 1,755  | 223 |
| -4                    | 6,075           | 189   | 4,170          | 161 | 1,905  | 248   | 7,604           | 164 | 5,666          | 125 | 1,938  | 206 |
| -3                    | 6,239           | 161   | 4,117          | 120 | 2,122  | 201   | 7,893           | 167 | 5,882          | 127 | 2,012  | 210 |
| -2                    | 6,741           | 177   | 4,266          | 140 | 2,475  | 226   | 8,227           | 148 | 5,916          | 125 | 2,311  | 193 |
| -1                    | 8,861           | 325   | 4,255          | 105 | 4,605  | 342   | 10,256          | 248 | 5,903          | 123 | 4,353  | 277 |
| 1                     | 13,390          | 330   | 4,790          | 141 | 8,600  | 358   | 13,979          | 273 | 6,391          | 201 | 7,588  | 339 |
| 2                     | 9,322           | 222   | 5,159          | 182 | 4,164  | 287   | 10,431          | 207 | 6,166          | 142 | 4,264  | 251 |
| 3                     | 9,130           | 246   | 4,982          | 153 | 4,148  | 290   | 10,429          | 220 | 6,279          | 172 | 4,150  | 279 |
| 4                     | 8,636           | 210   | 4,650          | 142 | 3,986  | 253   | 10,280          | 261 | 6,383          | 206 | 3,896  | 333 |
| 5                     | 8,810           | 250   | 4,916          | 162 | 3,894  | 298   | 10,521          | 315 | 6,251          | 214 | 4,270  | 381 |
| 6                     | 8,917           | 276   | 4,764          | 231 | 4,153  | 360   | 10,407          | 333 | 6,015          | 248 | 4,392  | 415 |
| 7                     | 9,609           | 521   | 5,349          | 293 | 4,260  | 597   | 11,335          | 501 | 6,043          | 239 | 5,292  | 555 |
| 8                     | 10,204          | 497   | 4,831          | 233 | 5,373  | 549   | 10,632          | 648 | 5,724          | 316 | 4,908  | 721 |
| 9                     | 10,365          | 575   | 5,479          | 697 | 4,886  | 904   | 10,070          | 571 | 5,612          | 354 | 4,458  | 671 |
| 10                    | 11,861          | 1,305 | 5,824          | 582 | 6,037  | 1,429 | 10,135          | 723 | 4,993          | 458 | 5,142  | 856 |
| Annual average        |                 |       |                |     |        |       |                 |     |                |     |        |     |
| Before the index date | 5,685           |       | 3,800          |     | 1,885  |       | 7,277           |     | 5,415          |     | 1,863  |     |
| After the index date  | 10,024          |       | 5,074          |     | 4,950  |       | 10,822          |     | 5,986          |     | 4,836  |     |
| Difference            | 4,339           |       | 1,274          |     | 3,065  |       | 3,544           |     | 571            |     | 2,973  |     |
| Ratio                 | 1.8             |       | 1.3            |     | 2.6    |       | 1.5             |     | 1.1            |     | 2.6    |     |

**Notes:**

Diabetes Cohort: The follow-up Year 1 *includes* outpatient or inpatient expenditures on diagnosis day.

Control Cohort: People not diagnosed with diabetes *during the study period*.

Excess= Average expenditures for diabetes cohort – average expenditures for control cohort.

%= Percent more for diabetes cohort compared to control cohort. SE=standard error around the mean. The excess expenditures are all statically significant (p<0.05, paired Student t-test).

SUPPLEMENTARY DATA

Supplementary Table 3a. Sensitivity Analysis I: Estimated per capita annual and cumulative excess medical expenditures during the 10 years before and after the index date (2013\$)

| Follow-up Year                | Annual medical expenditures |     |                |     |        |     |       | Cumulative medical expenditures |                |        |      |
|-------------------------------|-----------------------------|-----|----------------|-----|--------|-----|-------|---------------------------------|----------------|--------|------|
|                               | Diabetes Cohort             | SE  | Control Cohort | SE  | Excess | SE  | %     | Diabetes Cohort                 | Control Cohort | Excess | %    |
| -10                           | 4,722                       | 237 | 3,679          | 165 | 1,043  | 289 | 28.4  | 4,722                           | 3,679          | 1,043  | 28.4 |
| -9                            | 5,382                       | 216 | 4,129          | 147 | 1,253  | 262 | 30.3  | 10,104                          | 7,809          | 2,296  | 29.4 |
| -8                            | 5,477                       | 154 | 4,351          | 126 | 1,126  | 199 | 25.9  | 15,581                          | 12,160         | 3,421  | 28.1 |
| -7                            | 5,781                       | 130 | 4,475          | 105 | 1,306  | 167 | 29.2  | 21,362                          | 16,635         | 4,727  | 28.4 |
| -6                            | 6,120                       | 128 | 4,674          | 114 | 1,446  | 171 | 30.9  | 27,482                          | 21,309         | 6,173  | 29.0 |
| -5                            | 6,475                       | 125 | 4,785          | 95  | 1,690  | 157 | 35.3  | 33,957                          | 26,093         | 7,863  | 30.1 |
| -4                            | 6,856                       | 125 | 4,933          | 102 | 1,923  | 161 | 39.0  | 40,812                          | 31,026         | 9,786  | 31.5 |
| -3                            | 7,084                       | 116 | 5,021          | 88  | 2,064  | 146 | 41.1  | 47,897                          | 36,047         | 11,850 | 32.9 |
| -2                            | 7,500                       | 115 | 5,110          | 94  | 2,390  | 148 | 46.8  | 55,397                          | 41,157         | 14,240 | 34.6 |
| -1                            | 9,586                       | 204 | 5,094          | 81  | 4,492  | 219 | 88.2  | 64,982                          | 46,251         | 18,732 | 40.5 |
| 1                             | 12,403                      | 194 | 5,618          | 124 | 6,785  | 230 | 120.8 | 77,386                          | 51,869         | 25,517 | 49.2 |
| 2                             | 9,985                       | 152 | 5,724          | 115 | 4,261  | 190 | 74.4  | 87,371                          | 57,593         | 29,778 | 51.7 |
| 3                             | 9,914                       | 165 | 5,696          | 116 | 4,217  | 202 | 74.0  | 97,284                          | 63,289         | 33,995 | 53.7 |
| 4                             | 9,608                       | 169 | 5,622          | 128 | 3,985  | 212 | 70.9  | 106,892                         | 68,912         | 37,981 | 55.1 |
| 5                             | 9,845                       | 203 | 5,695          | 137 | 4,150  | 245 | 72.9  | 116,738                         | 74,607         | 42,131 | 56.5 |
| 6                             | 9,877                       | 219 | 5,515          | 172 | 4,362  | 278 | 79.1  | 126,614                         | 80,122         | 46,492 | 58.0 |
| 7                             | 10,751                      | 363 | 5,824          | 189 | 4,927  | 409 | 84.6  | 137,365                         | 85,946         | 51,419 | 59.8 |
| 8                             | 10,733                      | 413 | 5,428          | 200 | 5,305  | 459 | 97.7  | 148,098                         | 91,374         | 56,724 | 62.1 |
| 9                             | 10,700                      | 408 | 5,733          | 388 | 4,967  | 563 | 86.6  | 158,798                         | 97,107         | 61,691 | 63.5 |
| 10                            | 11,886                      | 751 | 5,724          | 377 | 6,162  | 840 | 107.6 | 170,684                         | 102,831        | 67,853 | 66.0 |
| Annual and cumulative average |                             |     |                |     |        |     |       |                                 |                |        |      |
| Before the index date         | 6,498                       |     | 4,625          |     | 1,873  |     |       | 64,982                          | 46,251         | 18,732 |      |
| After the index date          | 10,570                      |     | 5,658          |     | 4,912  |     |       | 105,702                         | 56,581         | 49,121 |      |
| Difference                    | 4,072                       |     | 1,033          |     | 3,039  |     |       | 40,719                          | 10,330         | 30,389 |      |
| Ratio                         | 1.6                         |     | 1.2            |     | 2.6    |     |       | 1.6                             | 1.2            | 2.6    |      |

**Notes:**

Diabetes Cohort: The follow-up Year 1 *excludes* outpatient or inpatient expenditures on diagnosis day.

Control Cohort: People not diagnosed with diabetes *during the study period*.

Excess= Average expenditures for diabetes cohort – average expenditures for control cohort. %= Percent more for diabetes cohort compared to control cohort. SE=standard error around the mean. The excess expenditures are all statically significant (p<0.05, paired Student t-test).

SUPPLEMENTARY DATA

Supplementary Table 4a. Sensitivity Analysis I: Estimated per capita total medical expenditures by components and follow-up years before and after the index date (2013\$).

| Follow-up Year        | Outpatient      |     |                |     |        |     | Inpatient       |     |                |     |        |     | Prescription Drugs |     |                |    |        |     |
|-----------------------|-----------------|-----|----------------|-----|--------|-----|-----------------|-----|----------------|-----|--------|-----|--------------------|-----|----------------|----|--------|-----|
|                       | Diabetes Cohort | SE  | Control Cohort | SE  | Excess | SE  | Diabetes Cohort | SE  | Control Cohort | SE  | Excess | SE  | Diabetes Cohort    | SE  | Control Cohort | SE | Excess | SE  |
| -10                   | 2521            | 131 | 2178           | 101 | 343    | 166 | 971             | 157 | 608            | 89  | 363    | 181 | 1231               | 49  | 893            | 44 | 337    | 66  |
| -9                    | 2720            | 90  | 2435           | 87  | 285    | 125 | 1283            | 157 | 704            | 82  | 579    | 177 | 1379               | 37  | 990            | 44 | 389    | 58  |
| -8                    | 2813            | 76  | 2492           | 71  | 321    | 104 | 1093            | 101 | 813            | 75  | 280    | 126 | 1571               | 36  | 1046           | 34 | 525    | 50  |
| -7                    | 2990            | 70  | 2646           | 64  | 345    | 95  | 1116            | 81  | 765            | 61  | 351    | 101 | 1674               | 32  | 1064           | 25 | 610    | 41  |
| -6                    | 3139            | 66  | 2756           | 61  | 383    | 89  | 1225            | 84  | 815            | 78  | 410    | 115 | 1756               | 29  | 1103           | 23 | 653    | 37  |
| -5                    | 3294            | 64  | 2876           | 58  | 417    | 87  | 1343            | 87  | 740            | 55  | 603    | 103 | 1838               | 28  | 1168           | 22 | 670    | 36  |
| -4                    | 3503            | 62  | 2948           | 58  | 555    | 85  | 1432            | 87  | 781            | 61  | 651    | 106 | 1921               | 27  | 1204           | 21 | 718    | 35  |
| -3                    | 3691            | 61  | 2985           | 54  | 706    | 81  | 1394            | 78  | 822            | 52  | 572    | 93  | 1999               | 25  | 1214           | 21 | 785    | 33  |
| -2                    | 3821            | 56  | 3033           | 52  | 789    | 76  | 1572            | 79  | 841            | 59  | 731    | 99  | 2106               | 26  | 1236           | 21 | 870    | 33  |
| -1                    | 4784            | 73  | 3089           | 52  | 1695   | 90  | 2532            | 170 | 724            | 40  | 1808   | 175 | 2270               | 28  | 1281           | 24 | 989    | 37  |
| 1                     | 5792            | 93  | 3343           | 67  | 2449   | 115 | 3400            | 136 | 973            | 72  | 2427   | 154 | 3212               | 33  | 1302           | 26 | 1910   | 42  |
| 2                     | 4991            | 87  | 3400           | 63  | 1591   | 108 | 2003            | 94  | 1008           | 75  | 995    | 120 | 2991               | 36  | 1316           | 27 | 1675   | 44  |
| 3                     | 4860            | 95  | 3418           | 75  | 1442   | 121 | 2109            | 100 | 964            | 59  | 1145   | 117 | 2944               | 36  | 1315           | 29 | 1630   | 47  |
| 4                     | 4759            | 103 | 3360           | 85  | 1399   | 134 | 1909            | 91  | 973            | 62  | 936    | 111 | 2940               | 39  | 1290           | 30 | 1650   | 49  |
| 5                     | 4787            | 119 | 3345           | 88  | 1442   | 148 | 2064            | 116 | 1075           | 77  | 988    | 139 | 2995               | 46  | 1276           | 30 | 1719   | 55  |
| 6                     | 4789            | 120 | 3342           | 112 | 1447   | 164 | 1998            | 131 | 943            | 94  | 1055   | 161 | 3089               | 56  | 1230           | 32 | 1859   | 65  |
| 7                     | 5031            | 151 | 3371           | 98  | 1660   | 180 | 2613            | 291 | 1239           | 118 | 1373   | 314 | 3107               | 62  | 1214           | 39 | 1893   | 73  |
| 8                     | 4934            | 198 | 3134           | 104 | 1800   | 224 | 2624            | 312 | 1086           | 135 | 1539   | 340 | 3174               | 74  | 1208           | 44 | 1966   | 86  |
| 9                     | 4813            | 198 | 3272           | 147 | 1541   | 246 | 2661            | 273 | 1306           | 331 | 1355   | 429 | 3226               | 92  | 1155           | 55 | 2071   | 107 |
| 10                    | 5314            | 346 | 3449           | 261 | 1865   | 434 | 3148            | 531 | 1031           | 175 | 2118   | 559 | 3423               | 237 | 1245           | 95 | 2178   | 256 |
| Annual Average        |                 |     |                |     |        |     |                 |     |                |     |        |     |                    |     |                |    |        |     |
| Before the index date | 3328            |     | 2744           |     | 584    |     | 1396            |     | 761            |     | 635    |     | 1775               |     | 1120           |    | 655    |     |
| After the index date  | 5007            |     | 3343           |     | 1664   |     | 2453            |     | 1060           |     | 1393   |     | 3110               |     | 1255           |    | 1855   |     |
| Difference            | 1680            |     | 600            |     | 1080   |     | 1057            |     | 299            |     | 758    |     | 1336               |     | 135            |    | 1201   |     |
| Ratio                 | 1.5             |     | 1.2            |     | 2.8    |     | 1.8             |     | 1.4            |     | 2.2    |     | 1.8                |     | 1.1            |    | 2.8    |     |

Notes:

Diabetes Cohort: The follow-up Year 1 *excludes* outpatient or inpatient expenditures on diagnosis day.

Control Cohort: People not diagnosed with diabetes *during the study period*.

## SUPPLEMENTARY DATA

Excess= Average expenditures for diabetes cohort – average expenditures for control cohort. %= Percent more for diabetes cohort compared to control cohort. SE=standard error around the mean. The excess expenditures are all statically significant ( $p < 0.05$ , paired Student t-test).

SUPPLEMENTARY DATA

Supplementary Table 5a. Sensitivity Analysis I: Estimated per capita total excess medical expenditures by age group and follow-up years before and after the index date (2013\$).

| Follow-up Year        | Aged: 25-44 Years |       |         |     |                   |       | Aged: 45-54 Years |     |         |     |        |       | Aged: 55-64 Years |       |         |     |        |       |
|-----------------------|-------------------|-------|---------|-----|-------------------|-------|-------------------|-----|---------|-----|--------|-------|-------------------|-------|---------|-----|--------|-------|
|                       | Diabetes          | SE    | Control | SE  | Excess            | SE    | Diabetes          | SE  | Control | SE  | Excess | SE    | Diabetes          | SE    | Control | SE  | Excess | SE    |
|                       | Cohort            |       | Cohort  |     | Cohort            |       | Cohort            |     | Cohort  |     | Cohort |       | Cohort            |       | Cohort  |     | Cohort |       |
| -10                   | 3,743             | 826   | 2,108   | 312 | 1,635             | 883   | 4,404             | 320 | 2,974   | 223 | 1,430  | 390   | 5,100             | 357   | 4,359   | 263 | 740    | 443   |
| -9                    | 3,574             | 336   | 3,818   | 517 | 244 <sup>NS</sup> | 616   | 4,113             | 192 | 3,356   | 234 | 757    | 303   | 6,668             | 387   | 4,623   | 270 | 2,044  | 472   |
| -8                    | 3,450             | 272   | 2,818   | 217 | 632               | 348   | 4,961             | 205 | 3,597   | 173 | 1,364  | 268   | 6,317             | 255   | 4,798   | 189 | 1,519  | 318   |
| -7                    | 4,060             | 278   | 3,271   | 276 | 790               | 392   | 5,282             | 180 | 3,647   | 127 | 1,635  | 220   | 6,620             | 213   | 5,166   | 175 | 1,454  | 276   |
| -6                    | 4,596             | 300   | 3,227   | 267 | 1,368             | 402   | 5,482             | 171 | 3,872   | 124 | 1,610  | 211   | 7,209             | 221   | 5,285   | 159 | 1,923  | 272   |
| -5                    | 4,806             | 251   | 3,651   | 244 | 1,155             | 350   | 6,047             | 169 | 4,025   | 98  | 2,023  | 196   | 7,514             | 226   | 5,881   | 204 | 1,633  | 304   |
| -4                    | 5,046             | 282   | 3,336   | 194 | 1,710             | 342   | 6,722             | 182 | 4,297   | 109 | 2,425  | 212   | 7,713             | 206   | 5,896   | 168 | 1,817  | 266   |
| -3                    | 4,983             | 206   | 3,431   | 160 | 1,552             | 261   | 6,873             | 148 | 4,579   | 107 | 2,293  | 183   | 8,396             | 249   | 5,896   | 164 | 2,500  | 298   |
| -2                    | 6,269             | 356   | 3,683   | 194 | 2,586             | 405   | 7,221             | 135 | 4,977   | 135 | 2,244  | 191   | 8,725             | 235   | 6,318   | 219 | 2,407  | 321   |
| -1                    | 7,132             | 264   | 3,347   | 143 | 3,785             | 300   | 9,152             | 215 | 4,946   | 106 | 4,206  | 240   | 11,784            | 560   | 6,974   | 321 | 4,810  | 645   |
| 1                     | 10,579            | 457   | 3,702   | 196 | 6,878             | 497   | 11,943            | 218 | 5,271   | 123 | 6,672  | 250   | 14,314            | 469   | 6,844   | 241 | 7,469  | 528   |
| 2                     | 7,947             | 270   | 4,188   | 261 | 3,759             | 376   | 9,894             | 195 | 5,366   | 141 | 4,528  | 241   | 11,269            | 338   | 7,124   | 309 | 4,144  | 458   |
| 3                     | 8,111             | 306   | 3,910   | 194 | 4,201             | 363   | 10,137            | 225 | 5,512   | 146 | 4,625  | 268   | 10,544            | 341   | 6,932   | 304 | 3,611  | 457   |
| 4                     | 8,289             | 359   | 4,194   | 219 | 4,094             | 421   | 9,779             | 225 | 5,553   | 158 | 4,226  | 275   | 10,165            | 357   | 6,779   | 261 | 3,385  | 442   |
| 5                     | 8,615             | 379   | 4,066   | 213 | 4,549             | 434   | 10,044            | 264 | 5,781   | 175 | 4,263  | 317   | 10,393            | 499   | 6,807   | 359 | 3,586  | 614   |
| 6                     | 9,308             | 577   | 4,077   | 225 | 5,232             | 619   | 9,859             | 251 | 5,705   | 208 | 4,154  | 326   | 10,819            | 620   | 7,360   | 609 | 3,458  | 869   |
| 7                     | 9,483             | 660   | 4,408   | 292 | 5,075             | 722   | 11,311            | 469 | 6,090   | 245 | 5,221  | 529   | 9,359             | 770   | 7,074   | 986 | 2,285  | 1,251 |
| 8                     | 10,634            | 1,232 | 4,079   | 301 | 6,555             | 1,268 | 10,810            | 401 | 5,785   | 251 | 5,025  | 472   | 9,887             | 1,357 | 6,392   | 910 | 3,495  | 1,634 |
| 9                     | 9,785             | 683   | 4,622   | 444 | 5,163             | 815   | 11,021            | 496 | 6,189   | 499 | 4,832  | 704   |                   |       |         |     |        |       |
| 10                    | 10,614            | 1,171 | 4,832   | 765 | 5,782             | 1,398 | 12,344            | 930 | 6,045   | 432 | 6,298  | 1,025 |                   |       |         |     |        |       |
| Annual average        |                   |       |         |     |                   |       |                   |     |         |     |        |       |                   |       |         |     |        |       |
| Before the index date | 4,766             |       | 3,269   |     | 1,546             |       | 6,026             |     | 4,027   |     | 1,999  |       | 7,604             |       | 5,520   |     | 2,085  |       |
| After the index date  | 9,337             |       | 4,208   |     | 5,129             |       | 10,714            |     | 5,730   |     | 4,985  |       | 10,844            |       | 6,914   |     | 3,929  |       |
| Difference            | 4,571             |       | 939     |     | 3,583             |       | 4,689             |     | 1,703   |     | 2,986  |       | 3,239             |       | 1,395   |     | 1,845  |       |
| Ratio                 | 2.0               |       | 1.3     |     | 3.3               |       | 1.8               |     | 1.4     |     | 2.5    |       | 1.4               |       | 1.3     |     | 1.9    |       |

Notes:

Diabetes Cohort: The follow-up Year 1 *excludes* outpatient or inpatient expenditures on diagnosis day.

Control Cohort: People not diagnosed with diabetes *during the study period*.

## SUPPLEMENTARY DATA

Aged= Age at diagnosis.

Excess= Average expenditures for diabetes cohort – average expenditures for control cohort. %= Percent more for diabetes cohort compared to control cohort. SE=standard error around the mean. The excess expenditures are all statically significant ( $p < 0.05$ , paired Student t-test).

SUPPLEMENTARY DATA

Supplementary Table 6a. Sensitivity Analysis I: estimated per capita total excess medical expenditure by sex and follow-up years before and after the index date (2013\$).

| Follow-up Year        | Males           |       |                |     |        |       | Females         |     |                |     |        |     |
|-----------------------|-----------------|-------|----------------|-----|--------|-------|-----------------|-----|----------------|-----|--------|-----|
|                       | Diabetes Cohort | SE    | Control Cohort | SE  | Excess | SE    | Diabetes Cohort | SE  | Control Cohort | SE  | Excess | SE  |
| -10                   | 4,078           | 347   | 2,921          | 216 | 1,157  | 409   | 5,349           | 322 | 4,408          | 247 | 942    | 406 |
| -9                    | 4,744           | 299   | 3,375          | 213 | 1,369  | 367   | 5,998           | 311 | 4,862          | 204 | 1,136  | 372 |
| -8                    | 4,490           | 166   | 3,464          | 162 | 1,027  | 232   | 6,423           | 254 | 5,192          | 192 | 1,231  | 318 |
| -7                    | 4,909           | 182   | 3,670          | 136 | 1,239  | 227   | 6,617           | 184 | 5,245          | 158 | 1,372  | 242 |
| -6                    | 5,122           | 164   | 3,793          | 151 | 1,329  | 223   | 7,080           | 194 | 5,501          | 167 | 1,579  | 256 |
| -5                    | 5,591           | 174   | 3,972          | 136 | 1,618  | 221   | 7,327           | 179 | 5,572          | 132 | 1,755  | 223 |
| -4                    | 6,075           | 189   | 4,170          | 161 | 1,905  | 248   | 7,604           | 164 | 5,666          | 125 | 1,938  | 206 |
| -3                    | 6,239           | 161   | 4,117          | 120 | 2,122  | 201   | 7,893           | 167 | 5,882          | 127 | 2,012  | 210 |
| -2                    | 6,741           | 177   | 4,266          | 140 | 2,475  | 226   | 8,227           | 148 | 5,916          | 125 | 2,311  | 193 |
| -1                    | 8,861           | 325   | 4,255          | 105 | 4,605  | 342   | 10,256          | 248 | 5,903          | 123 | 4,353  | 277 |
| 1                     | 11,962          | 305   | 4,790          | 141 | 7,172  | 335   | 12,755          | 242 | 6,391          | 201 | 6,364  | 315 |
| 2                     | 9,322           | 222   | 5,159          | 182 | 4,164  | 287   | 10,431          | 207 | 6,166          | 142 | 4,264  | 251 |
| 3                     | 9,130           | 246   | 4,982          | 153 | 4,148  | 290   | 10,429          | 220 | 6,279          | 172 | 4,150  | 279 |
| 4                     | 8,636           | 210   | 4,650          | 142 | 3,986  | 253   | 10,280          | 261 | 6,383          | 206 | 3,896  | 333 |
| 5                     | 8,810           | 250   | 4,916          | 162 | 3,894  | 298   | 10,521          | 315 | 6,251          | 214 | 4,270  | 381 |
| 6                     | 8,917           | 276   | 4,764          | 231 | 4,153  | 360   | 10,407          | 333 | 6,015          | 248 | 4,392  | 415 |
| 7                     | 9,609           | 521   | 5,349          | 293 | 4,260  | 597   | 11,335          | 501 | 6,043          | 239 | 5,292  | 555 |
| 8                     | 10,204          | 497   | 4,831          | 233 | 5,373  | 549   | 10,632          | 648 | 5,724          | 316 | 4,908  | 721 |
| 9                     | 10,365          | 575   | 5,479          | 697 | 4,886  | 904   | 10,070          | 571 | 5,612          | 354 | 4,458  | 671 |
| 10                    | 11,861          | 1,305 | 5,824          | 582 | 6,037  | 1,429 | 10,135          | 723 | 4,993          | 458 | 5,142  | 856 |
| Annual average        |                 |       |                |     |        |       |                 |     |                |     |        |     |
| Before the index date | 5,685           |       | 3,800          |     | 1,885  |       | 7,277           |     | 5,415          |     | 1,863  |     |
| After the index date  | 9,882           |       | 5,074          |     | 4,807  |       | 10,699          |     | 5,986          |     | 4,714  |     |
| Difference            | 4,197           |       | 1,274          |     | 2,923  |       | 3,422           |     | 571            |     | 2,851  |     |
| Ratio                 | 1.7             |       | 1.3            |     | 2.6    |       | 1.5             |     | 1.1            |     | 2.5    |     |

**Notes:**

Diabetes Cohort: The follow-up Year 1 *excludes* outpatient or inpatient expenditures on diagnosis day.

Control Cohort: People not diagnosed with diabetes *during the study period*.

Excess= Average expenditures for diabetes cohort – average expenditures for control cohort. %= Percent more for diabetes cohort compared to control cohort. SE=standard error around the mean. The excess expenditures are all statically significant (p<0.05, paired Student t-test).

SUPPLEMENTARY DATA

Supplementary Table 1a. Sensitivity Analysis II: Matched cohort size and follow-up years before and after the index date.

**All Sample**

| Cohort | Years, Pre and Post Index Date |      |       |       |       |       |       |       |       |       |       |       |       |       |       |       |       |       |      |      |
|--------|--------------------------------|------|-------|-------|-------|-------|-------|-------|-------|-------|-------|-------|-------|-------|-------|-------|-------|-------|------|------|
|        | -10                            | -9   | -8    | -7    | -6    | -5    | -4    | -3    | -2    | -1    | 1     | 2     | 3     | 4     | 5     | 6     | 7     | 8     | 9    | 10   |
| 2003   | 0                              | 0    | 0     | 0     | 0     | 0     | 0     | 0     | 3922  | 3922  | 3922  | 3901  | 3874  | 3853  | 3834  | 3808  | 3793  | 3784  | 3763 | 3763 |
| 2004   | 0                              | 0    | 0     | 0     | 0     | 0     | 0     | 4080  | 4080  | 4080  | 4080  | 4063  | 4039  | 4016  | 3985  | 3963  | 3948  | 3925  | 3925 | 0    |
| 2005   | 0                              | 0    | 0     | 0     | 0     | 0     | 4218  | 4218  | 4218  | 4218  | 4218  | 4192  | 4171  | 4144  | 4115  | 4092  | 4072  | 4072  | 0    | 0    |
| 2006   | 0                              | 0    | 0     | 0     | 0     | 4704  | 4704  | 4704  | 4704  | 4704  | 4704  | 4668  | 4639  | 4607  | 4580  | 4557  | 4557  | 0     | 0    | 0    |
| 2007   | 0                              | 0    | 0     | 0     | 4782  | 4782  | 4782  | 4782  | 4782  | 4782  | 4782  | 4755  | 4728  | 4711  | 4686  | 4686  | 0     | 0     | 0    | 0    |
| 2008   | 0                              | 0    | 0     | 4494  | 4494  | 4494  | 4494  | 4494  | 4494  | 4494  | 4494  | 4469  | 4435  | 4418  | 4418  | 0     | 0     | 0     | 0    | 0    |
| 2009   | 0                              | 0    | 4844  | 4844  | 4844  | 4844  | 4844  | 4844  | 4844  | 4844  | 4844  | 4822  | 4793  | 4793  | 0     | 0     | 0     | 0     | 0    | 0    |
| 2010   | 0                              | 4428 | 4428  | 4428  | 4428  | 4428  | 4428  | 4428  | 4428  | 4428  | 4428  | 4395  | 4395  | 0     | 0     | 0     | 0     | 0     | 0    | 0    |
| 2011   | 4254                           | 4254 | 4254  | 4254  | 4254  | 4254  | 4254  | 4254  | 4254  | 4254  | 4254  | 4254  | 0     | 0     | 0     | 0     | 0     | 0     | 0    | 0    |
| Total  | 4254                           | 8682 | 13526 | 18020 | 22802 | 27506 | 31724 | 35804 | 39726 | 39726 | 39726 | 39519 | 35074 | 30542 | 25618 | 21106 | 16370 | 11781 | 7688 | 3763 |

**Age at diagnosis: 25-44 Years**

| Cohort | Years, Pre and Post Index Date |     |      |      |      |      |      |      |      |      |      |      |      |      |      |      |      |      |      |      |
|--------|--------------------------------|-----|------|------|------|------|------|------|------|------|------|------|------|------|------|------|------|------|------|------|
|        | -10                            | -9  | -8   | -7   | -6   | -5   | -4   | -3   | -2   | -1   | 1    | 2    | 3    | 4    | 5    | 6    | 7    | 8    | 9    | 10   |
| 2003   | 0                              | 0   | 0    | 0    | 0    | 0    | 0    | 0    | 1038 | 1038 | 1038 | 1033 | 1031 | 1026 | 1022 | 1020 | 1017 | 1015 | 1014 | 1014 |
| 2004   | 0                              | 0   | 0    | 0    | 0    | 0    | 0    | 940  | 940  | 940  | 940  | 939  | 937  | 935  | 934  | 932  | 930  | 927  | 927  | 0    |
| 2005   | 0                              | 0   | 0    | 0    | 0    | 0    | 878  | 878  | 878  | 878  | 878  | 875  | 871  | 869  | 866  | 865  | 861  | 861  | 0    | 0    |
| 2006   | 0                              | 0   | 0    | 0    | 0    | 726  | 726  | 726  | 726  | 726  | 726  | 722  | 720  | 718  | 717  | 716  | 716  | 0    | 0    | 0    |
| 2007   | 0                              | 0   | 0    | 0    | 688  | 688  | 688  | 688  | 688  | 688  | 688  | 685  | 683  | 683  | 681  | 681  | 0    | 0    | 0    | 0    |
| 2008   | 0                              | 0   | 0    | 500  | 500  | 500  | 500  | 500  | 500  | 500  | 500  | 499  | 496  | 495  | 495  | 0    | 0    | 0    | 0    | 0    |
| 2009   | 0                              | 0   | 540  | 540  | 540  | 540  | 540  | 540  | 540  | 540  | 540  | 539  | 538  | 538  | 0    | 0    | 0    | 0    | 0    | 0    |
| 2010   | 0                              | 396 | 396  | 396  | 396  | 396  | 396  | 396  | 396  | 396  | 396  | 394  | 394  | 0    | 0    | 0    | 0    | 0    | 0    | 0    |
| 2011   | 346                            | 346 | 346  | 346  | 346  | 346  | 346  | 346  | 346  | 346  | 346  | 346  | 0    | 0    | 0    | 0    | 0    | 0    | 0    | 0    |
| Total  | 346                            | 742 | 1282 | 1782 | 2470 | 3196 | 4074 | 5014 | 6052 | 6052 | 6052 | 6032 | 5670 | 5264 | 4715 | 4214 | 3524 | 2803 | 1941 | 1014 |



SUPPLEMENTARY DATA

**Age at diagnosis: 45-54 Years**

| Cohort | Years, Pre and Post Index Date |      |      |      |       |       |       |       |       |       |       |       |       |       |       |       |       |      |      |      |
|--------|--------------------------------|------|------|------|-------|-------|-------|-------|-------|-------|-------|-------|-------|-------|-------|-------|-------|------|------|------|
|        | -10                            | -9   | -8   | -7   | -6    | -5    | -4    | -3    | -2    | -1    | 1     | 2     | 3     | 4     | 5     | 6     | 7     | 8    | 9    | 10   |
| 2003   | 0                              | 0    | 0    | 0    | 0     | 0     | 0     | 0     | 2884  | 2884  | 2884  | 2868  | 2843  | 2827  | 2812  | 2788  | 2776  | 2769 | 2749 | 2749 |
| 2004   | 0                              | 0    | 0    | 0    | 0     | 0     | 0     | 3106  | 3106  | 3106  | 3106  | 3090  | 3068  | 3045  | 3015  | 2995  | 2983  | 2965 | 2965 | 0    |
| 2005   | 0                              | 0    | 0    | 0    | 0     | 0     | 2898  | 2898  | 2898  | 2898  | 2898  | 2883  | 2871  | 2854  | 2836  | 2820  | 2804  | 2804 | 0    | 0    |
| 2006   | 0                              | 0    | 0    | 0    | 0     | 2952  | 2952  | 2952  | 2952  | 2952  | 2952  | 2929  | 2909  | 2891  | 2872  | 2852  | 2852  | 0    | 0    | 0    |
| 2007   | 0                              | 0    | 0    | 0    | 2742  | 2742  | 2742  | 2742  | 2742  | 2742  | 2742  | 2732  | 2717  | 2710  | 2696  | 2696  | 0     | 0    | 0    | 0    |
| 2008   | 0                              | 0    | 0    | 2230 | 2230  | 2230  | 2230  | 2230  | 2230  | 2230  | 2230  | 2218  | 2206  | 2201  | 2201  | 0     | 0     | 0    | 0    | 0    |
| 2009   | 0                              | 0    | 2196 | 2196 | 2196  | 2196  | 2196  | 2196  | 2196  | 2196  | 2196  | 2187  | 2177  | 2177  | 0     | 0     | 0     | 0    | 0    | 0    |
| 2010   | 0                              | 1838 | 1838 | 1838 | 1838  | 1838  | 1838  | 1838  | 1838  | 1838  | 1838  | 1825  | 1825  | 0     | 0     | 0     | 0     | 0    | 0    | 0    |
| 2011   | 1632                           | 1632 | 1632 | 1632 | 1632  | 1632  | 1632  | 1632  | 1632  | 1632  | 1632  | 1632  | 0     | 0     | 0     | 0     | 0     | 0    | 0    | 0    |
| Total  | 1632                           | 3470 | 5666 | 7896 | 10638 | 13590 | 16488 | 19594 | 22478 | 22478 | 22478 | 22364 | 20616 | 18705 | 16432 | 14151 | 11415 | 8538 | 5714 | 2749 |

**Age at diagnosis: 55-64 Years**

| Cohort | Years, Pre and Post Index Date |      |      |      |      |       |       |       |       |       |       |       |      |      |      |      |      |     |    |    |
|--------|--------------------------------|------|------|------|------|-------|-------|-------|-------|-------|-------|-------|------|------|------|------|------|-----|----|----|
|        | -10                            | -9   | -8   | -7   | -6   | -5    | -4    | -3    | -2    | -1    | 1     | 2     | 3    | 4    | 5    | 6    | 7    | 8   | 9  | 10 |
| 2003   | 0                              | 0    | 0    | 0    | 0    | 0     | 0     | 0     | 0     | 0     | 0     | 0     | 0    | 0    | 0    | 0    | 0    | 0   | 0  | 0  |
| 2004   | 0                              | 0    | 0    | 0    | 0    | 0     | 0     | 34    | 34    | 34    | 34    | 34    | 34   | 34   | 34   | 33   | 33   | 33  | 33 | 0  |
| 2005   | 0                              | 0    | 0    | 0    | 0    | 0     | 442   | 442   | 442   | 442   | 442   | 441   | 440  | 433  | 430  | 429  | 427  | 427 | 0  | 0  |
| 2006   | 0                              | 0    | 0    | 0    | 0    | 1026  | 1026  | 1026  | 1026  | 1026  | 1026  | 1020  | 1008 | 1001 | 995  | 987  | 987  | 0   | 0  | 0  |
| 2007   | 0                              | 0    | 0    | 0    | 1352 | 1352  | 1352  | 1352  | 1352  | 1352  | 1352  | 1338  | 1322 | 1315 | 1305 | 1305 | 0    | 0   | 0  | 0  |
| 2008   | 0                              | 0    | 0    | 1764 | 1764 | 1764  | 1764  | 1764  | 1764  | 1764  | 1764  | 1751  | 1736 | 1725 | 1725 | 0    | 0    | 0   | 0  | 0  |
| 2009   | 0                              | 0    | 2108 | 2108 | 2108 | 2108  | 2108  | 2108  | 2108  | 2108  | 2108  | 2088  | 2076 | 2076 | 0    | 0    | 0    | 0   | 0  | 0  |
| 2010   | 0                              | 2194 | 2194 | 2194 | 2194 | 2194  | 2194  | 2194  | 2194  | 2194  | 2194  | 2179  | 2179 | 0    | 0    | 0    | 0    | 0   | 0  | 0  |
| 2011   | 2276                           | 2276 | 2276 | 2276 | 2276 | 2276  | 2276  | 2276  | 2276  | 2276  | 2276  | 2276  | 0    | 0    | 0    | 0    | 0    | 0   | 0  | 0  |
| Total  | 2276                           | 4470 | 6578 | 8342 | 9694 | 10720 | 11162 | 11196 | 11196 | 11196 | 11196 | 11127 | 8795 | 6584 | 4489 | 2754 | 1447 | 460 | 33 | 0  |

SUPPLEMENTARY DATA

**Males**

| Cohort | Years, Pre and Post Index Date |      |      |      |       |       |       |       |       |       |       |       |       |       |       |       |      |      |      |      |
|--------|--------------------------------|------|------|------|-------|-------|-------|-------|-------|-------|-------|-------|-------|-------|-------|-------|------|------|------|------|
|        | -10                            | -9   | -8   | -7   | -6    | -5    | -4    | -3    | -2    | -1    | 1     | 2     | 3     | 4     | 5     | 6     | 7    | 8    | 9    | 10   |
| 2003   | 0                              | 0    | 0    | 0    | 0     | 0     | 0     | 0     | 1936  | 1936  | 1936  | 1930  | 1915  | 1901  | 1889  | 1876  | 1867 | 1862 | 1854 | 1854 |
| 2004   | 0                              | 0    | 0    | 0    | 0     | 0     | 0     | 1986  | 1986  | 1986  | 1986  | 1974  | 1960  | 1947  | 1929  | 1919  | 1910 | 1896 | 1896 | 0    |
| 2005   | 0                              | 0    | 0    | 0    | 0     | 0     | 2024  | 2024  | 2024  | 2024  | 2024  | 2010  | 2004  | 1993  | 1976  | 1961  | 1953 | 1953 | 0    | 0    |
| 2006   | 0                              | 0    | 0    | 0    | 0     | 2318  | 2318  | 2318  | 2318  | 2318  | 2318  | 2303  | 2288  | 2268  | 2249  | 2238  | 2238 | 0    | 0    | 0    |
| 2007   | 0                              | 0    | 0    | 0    | 2356  | 2356  | 2356  | 2356  | 2356  | 2356  | 2356  | 2344  | 2330  | 2318  | 2308  | 2308  | 0    | 0    | 0    | 0    |
| 2008   | 0                              | 0    | 0    | 2202 | 2202  | 2202  | 2202  | 2202  | 2202  | 2202  | 2202  | 2192  | 2177  | 2168  | 2168  | 0     | 0    | 0    | 0    | 0    |
| 2009   | 0                              | 0    | 2358 | 2358 | 2358  | 2358  | 2358  | 2358  | 2358  | 2358  | 2358  | 2346  | 2330  | 2330  | 0     | 0     | 0    | 0    | 0    | 0    |
| 2010   | 0                              | 2166 | 2166 | 2166 | 2166  | 2166  | 2166  | 2166  | 2166  | 2166  | 2166  | 2154  | 2154  | 0     | 0     | 0     | 0    | 0    | 0    | 0    |
| 2011   | 2098                           | 2098 | 2098 | 2098 | 2098  | 2098  | 2098  | 2098  | 2098  | 2098  | 2098  | 2098  | 2098  | 0     | 0     | 0     | 0    | 0    | 0    | 0    |
| Total  | 2098                           | 4264 | 6622 | 8824 | 11180 | 13498 | 15522 | 17508 | 19444 | 19444 | 19444 | 19351 | 17158 | 14925 | 12519 | 10302 | 7968 | 5711 | 3750 | 1854 |

**Females**

| Cohort | Years, Pre and Post Index Date |      |      |      |       |       |       |       |       |       |       |       |       |       |       |       |      |      |      |      |
|--------|--------------------------------|------|------|------|-------|-------|-------|-------|-------|-------|-------|-------|-------|-------|-------|-------|------|------|------|------|
|        | -10                            | -9   | -8   | -7   | -6    | -5    | -4    | -3    | -2    | -1    | 1     | 2     | 3     | 4     | 5     | 6     | 7    | 8    | 9    | 10   |
| 2003   | 0                              | 0    | 0    | 0    | 0     | 0     | 0     | 0     | 1986  | 1986  | 1986  | 1971  | 1959  | 1952  | 1945  | 1932  | 1926 | 1922 | 1909 | 1909 |
| 2004   | 0                              | 0    | 0    | 0    | 0     | 0     | 0     | 2094  | 2094  | 2094  | 2094  | 2089  | 2079  | 2069  | 2056  | 2044  | 2038 | 2029 | 2029 | 0    |
| 2005   | 0                              | 0    | 0    | 0    | 0     | 0     | 2194  | 2194  | 2194  | 2194  | 2194  | 2182  | 2167  | 2151  | 2139  | 2131  | 2119 | 2119 | 0    | 0    |
| 2006   | 0                              | 0    | 0    | 0    | 0     | 2386  | 2386  | 2386  | 2386  | 2386  | 2386  | 2365  | 2351  | 2339  | 2331  | 2319  | 2319 | 0    | 0    | 0    |
| 2007   | 0                              | 0    | 0    | 0    | 2426  | 2426  | 2426  | 2426  | 2426  | 2426  | 2426  | 2411  | 2398  | 2393  | 2378  | 2378  | 0    | 0    | 0    | 0    |
| 2008   | 0                              | 0    | 0    | 2292 | 2292  | 2292  | 2292  | 2292  | 2292  | 2292  | 2292  | 2277  | 2258  | 2250  | 2250  | 0     | 0    | 0    | 0    | 0    |
| 2009   | 0                              | 0    | 2486 | 2486 | 2486  | 2486  | 2486  | 2486  | 2486  | 2486  | 2486  | 2476  | 2463  | 2463  | 0     | 0     | 0    | 0    | 0    | 0    |
| 2010   | 0                              | 2262 | 2262 | 2262 | 2262  | 2262  | 2262  | 2262  | 2262  | 2262  | 2262  | 2241  | 2241  | 0     | 0     | 0     | 0    | 0    | 0    | 0    |
| 2011   | 2156                           | 2156 | 2156 | 2156 | 2156  | 2156  | 2156  | 2156  | 2156  | 2156  | 2156  | 2156  | 2156  | 0     | 0     | 0     | 0    | 0    | 0    | 0    |
| Total  | 2156                           | 4418 | 6904 | 9196 | 11622 | 14008 | 16202 | 18296 | 20282 | 20282 | 20282 | 20168 | 17916 | 15617 | 13099 | 10804 | 8402 | 6070 | 3938 | 1909 |

**Notes:** Control Cohort: People not diagnosed with diabetes *in the year of case control matching.*

SUPPLEMENTARY DATA

Supplementary Table 2a. Sensitivity Analysis II: Summary statistics of matched cohort samples in the year of matching.

| Variable          | All                           |      |                              |      | Males                        |      |                             |      | Females                       |      |                              |      |
|-------------------|-------------------------------|------|------------------------------|------|------------------------------|------|-----------------------------|------|-------------------------------|------|------------------------------|------|
|                   | Diabetes Cohort<br>(n=19,863) |      | Control Cohort<br>(n=19,863) |      | Diabetes Cohort<br>(n=9,722) |      | Control Cohort<br>(n=9,722) |      | Diabetes Cohort<br>(n=10,141) |      | Control Cohort<br>(n=10,141) |      |
|                   | Mean                          | SE   | Mean                         | SE   | Mean                         | SE   | Mean                        | SE   | Mean                          | SE   | Mean                         | SE   |
| Age, Years (Mean) | 50.67                         | 0.04 | 50.67                        | 0.04 | 50.69                        | 0.06 | 50.69                       | 0.06 | 50.65                         | 0.06 | 50.65                        | 0.06 |
| Female, %         | 51.05                         | 0.35 | 51.05                        | 0.35 | 72.96                        | 0.45 | 72.96                       | 0.45 | 68.91                         | 0.46 | 68.91                        | 0.46 |
| Metro, %          | 70.89                         | 0.32 | 70.89                        | 0.32 |                              |      |                             |      |                               |      |                              |      |
| Census Region, %: |                               |      |                              |      | 4.31                         | 0.21 | 4.31                        | 0.21 | 3.03                          | 0.17 | 3.03                         | 0.17 |
| Northeast         | 3.66                          | 0.13 | 3.92                         | 0.13 | 40.32                        | 0.50 | 40.32                       | 0.50 | 34.44                         | 0.47 | 34.44                        | 0.47 |
| Midwest           | 37.33                         | 0.34 | 38.00                        | 0.34 | 38.81                        | 0.49 | 38.81                       | 0.49 | 49.19                         | 0.50 | 49.19                        | 0.50 |
| South             | 44.11                         | 0.35 | 44.80                        | 0.35 | 16.49                        | 0.38 | 16.49                       | 0.38 | 13.31                         | 0.34 | 13.31                        | 0.34 |
| West              | 14.87                         | 0.25 | 15.36                        | 0.25 | 61.27                        | 0.49 | 61.27                       | 0.49 | 55.86                         | 0.49 | 55.86                        | 0.49 |
| PPO,%             | 58.51                         | 0.35 | 59.19                        | 0.35 | 50.69                        | 0.06 | 50.69                       | 0.06 | 50.65                         | 0.06 | 50.65                        | 0.06 |

| Variable          | Aged: 25-44 Years            |      |                             |      | Aged: 45-54 Years             |      |                              |      | Aged: 55-64 Years            |      |                             |      |
|-------------------|------------------------------|------|-----------------------------|------|-------------------------------|------|------------------------------|------|------------------------------|------|-----------------------------|------|
|                   | Diabetes Cohort<br>(n=3,026) |      | Control Cohort<br>(n=3,026) |      | Diabetes Cohort<br>(n=11,239) |      | Control Cohort<br>(n=11,239) |      | Diabetes Cohort<br>(n=5,598) |      | Control Cohort<br>(n=5,598) |      |
|                   | Mean                         | SE   | Mean                        | SE   | Mean                          | SE   | Mean                         | SE   | Mean                         | SE   | Mean                        | SE   |
| Age, Years (Mean) | 40.11                        | 0.06 | 40.11                       | 0.06 | 50.31                         | 0.03 | 50.31                        | 0.03 | 57.10                        | 0.02 | 57.10                       | 0.02 |
| Female, %         | 53.60                        | 0.91 | 53.60                       | 0.91 | 50.32                         | 0.47 | 50.32                        | 0.47 | 51.16                        | 0.67 | 51.16                       | 0.67 |
| Metro, %          | 62.49                        | 0.88 | 62.49                       | 0.88 | 71.68                         | 0.43 | 71.68                        | 0.43 | 73.85                        | 0.59 | 73.83                       | 0.59 |
| Census Region, %: |                              |      |                             |      |                               |      |                              |      |                              |      |                             |      |
| Northeast         | 2.51                         | 0.28 | 2.51                        | 0.28 | 3.70                          | 0.18 | 3.70                         | 0.18 | 4.18                         | 0.27 | 4.18                        | 0.27 |
| Midwest           | 31.10                        | 0.84 | 31.10                       | 0.84 | 38.66                         | 0.46 | 38.66                        | 0.46 | 38.00                        | 0.65 | 38.00                       | 0.65 |
| South             | 51.82                        | 0.91 | 51.82                       | 0.91 | 43.46                         | 0.47 | 43.46                        | 0.47 | 41.23                        | 0.66 | 41.23                       | 0.66 |
| West              | 14.51                        | 0.64 | 14.51                       | 0.64 | 14.13                         | 0.33 | 14.13                        | 0.33 | 16.54                        | 0.50 | 16.54                       | 0.50 |
| PPO,%             | 40.11                        | 0.06 | 40.11                       | 0.06 | 50.31                         | 0.03 | 50.31                        | 0.03 | 57.10                        | 0.02 | 57.10                       | 0.02 |

**Notes:**

Control Cohort: People not diagnosed with diabetes *in the year of case-control matching*.

Aged= Age at diagnosis.

The testing of balance propensity score matching shows that the % biases for each covariates after matching in each year were less than 1%. Metro= residence in Metropolitan statistical area; PPO= Preferred Provider Organization; SE= Standard error.

SUPPLEMENTARY DATA

Supplementary Table 3b. Sensitivity Analysis II: Estimated per capita annual and cumulative excess medical expenditures during the 10 years before and after the index date (2013\$).

| Follow-up Year                | Annual medical expenditures |     |                |     |        |     |       | Cumulative medical expenditures |                |        |      |
|-------------------------------|-----------------------------|-----|----------------|-----|--------|-----|-------|---------------------------------|----------------|--------|------|
|                               | Diabetes Cohort             | SE  | Control Cohort | SE  | Excess | SE  | %     | Diabetes Cohort                 | Control Cohort | Excess | %    |
| -10                           | 4,722                       | 237 | 3,905          | 188 | 817    | 302 | 20.9  | 4,722                           | 3,905          | 817    | 20.9 |
| -9                            | 5,382                       | 216 | 3,907          | 130 | 1,475  | 252 | 37.7  | 10,104                          | 7,813          | 2,292  | 29.3 |
| -8                            | 5,477                       | 154 | 4,371          | 128 | 1,106  | 200 | 25.3  | 15,581                          | 12,184         | 3,398  | 27.9 |
| -7                            | 5,781                       | 130 | 4,410          | 115 | 1,370  | 173 | 31.1  | 21,362                          | 16,594         | 4,768  | 28.7 |
| -6                            | 6,120                       | 128 | 4,759          | 124 | 1,361  | 178 | 28.6  | 27,482                          | 21,353         | 6,129  | 28.7 |
| -5                            | 6,475                       | 125 | 4,788          | 91  | 1,687  | 155 | 35.2  | 33,957                          | 26,141         | 7,816  | 29.9 |
| -4                            | 6,856                       | 125 | 5,075          | 98  | 1,781  | 159 | 35.1  | 40,812                          | 31,216         | 9,597  | 30.7 |
| -3                            | 7,084                       | 116 | 5,091          | 101 | 1,993  | 154 | 39.1  | 47,897                          | 36,307         | 11,590 | 31.9 |
| -2                            | 7,500                       | 115 | 5,170          | 97  | 2,330  | 150 | 45.1  | 55,397                          | 41,477         | 13,920 | 33.6 |
| -1                            | 9,586                       | 204 | 5,373          | 112 | 4,213  | 232 | 78.4  | 64,982                          | 46,850         | 18,132 | 38.7 |
| 1                             | 13,727                      | 213 | 5,635          | 109 | 8,092  | 240 | 143.6 | 78,710                          | 52,485         | 26,224 | 50.0 |
| 2                             | 9,985                       | 152 | 5,640          | 107 | 4,345  | 186 | 77.0  | 88,695                          | 58,126         | 30,569 | 52.6 |
| 3                             | 9,914                       | 165 | 5,694          | 108 | 4,220  | 198 | 74.1  | 98,608                          | 63,819         | 34,789 | 54.5 |
| 4                             | 9,608                       | 169 | 5,642          | 123 | 3,966  | 211 | 70.3  | 108,216                         | 69,462         | 38,754 | 55.8 |
| 5                             | 9,845                       | 203 | 5,550          | 127 | 4,296  | 242 | 77.4  | 118,061                         | 75,011         | 43,050 | 57.4 |
| 6                             | 9,877                       | 219 | 5,598          | 178 | 4,279  | 284 | 76.4  | 127,938                         | 80,609         | 47,329 | 58.7 |
| 7                             | 10,751                      | 363 | 5,918          | 218 | 4,832  | 431 | 81.6  | 138,689                         | 86,528         | 52,161 | 60.3 |
| 8                             | 10,733                      | 413 | 5,916          | 313 | 4,817  | 524 | 81.4  | 149,422                         | 92,444         | 56,978 | 61.6 |
| 9                             | 10,700                      | 408 | 5,526          | 254 | 5,173  | 490 | 93.6  | 160,122                         | 97,970         | 62,152 | 63.4 |
| 10                            | 11,886                      | 751 | 5,688          | 384 | 6,198  | 865 | 109.0 | 172,008                         | 103,658        | 68,349 | 65.9 |
| Annual and cumulative average |                             |     |                |     |        |     |       |                                 |                |        |      |
| Before the index date         | 6,498                       |     | 4,685          |     | 1,813  |     |       | 64,982                          | 46,850         | 18,132 |      |
| After the index date          | 10,703                      |     | 5,681          |     | 5,022  |     |       | 107,025                         | 56,808         | 50,217 |      |
| Difference                    | 4,204                       |     | 996            |     | 3,209  |     |       | 42,043                          | 9,958          | 32,085 |      |
| Ratio                         | 1.6                         |     | 1.2            |     | 2.8    |     |       | 1.6                             | 1.2            | 2.8    |      |

**Notes:**

Diabetes Cohort: The follow-up Year 1 *includes* outpatient or inpatient expenditures on diagnosis day.

Control Cohort: People not diagnosed with diabetes *in the year of case-control matching*.

When the outpatient or inpatient costs on diagnosis day were excluded (as in Sensitivity Analysis I), the estimated medical and corresponding excess expenditures (SE) for Diabetes cohort in the follow-up year 1 were \$12,403 (194) and \$6,768 (\$223).

Excess= Average expenditures for diabetes cohort – average expenditures for control cohort. %= Percent more for diabetes cohort compared to control cohort. SE=standard error around the mean. The excess expenditures are all statically significant (p<0.05, paired Student t-test).

SUPPLEMENTARY DATA

Supplementary Table 4b. Sensitivity Analysis II: Estimated per capita total medical expenditures by components and follow-up years before and after the index date (2013\$).

| Follow-up Year        | Outpatient      |     |                |     |                   |     | Inpatient       |     |                |     |        |     | Prescription Drugs |    |                |    |        |    |
|-----------------------|-----------------|-----|----------------|-----|-------------------|-----|-----------------|-----|----------------|-----|--------|-----|--------------------|----|----------------|----|--------|----|
|                       | Diabetes Cohort | SE  | Control Cohort | SE  | Excess            | SE  | Diabetes Cohort | SE  | Control Cohort | SE  | Excess | SE  | Diabetes Cohort    | SE | Control Cohort | SE | Excess | SE |
| -10                   | 2,521           | 131 | 2,373          | 128 | 148 <sup>NS</sup> | 183 | 971             | 157 | 578            | 87  | 393    | 180 | 1,231              | 49 | 954            | 53 | 276    | 72 |
| -9                    | 2,720           | 90  | 2,306          | 77  | 414               | 118 | 1,283           | 157 | 592            | 72  | 690    | 173 | 1,379              | 37 | 1,009          | 43 | 370    | 57 |
| -8                    | 2,813           | 76  | 2,590          | 74  | 223               | 106 | 1,093           | 101 | 752            | 75  | 341    | 126 | 1,571              | 36 | 1,029          | 32 | 542    | 48 |
| -7                    | 2,990           | 70  | 2,598          | 62  | 393               | 94  | 1,116           | 81  | 744            | 78  | 373    | 113 | 1,674              | 32 | 1,069          | 26 | 605    | 41 |
| -6                    | 3,139           | 66  | 2,862          | 72  | 277               | 97  | 1,225           | 84  | 778            | 72  | 448    | 111 | 1,756              | 29 | 1,120          | 23 | 636    | 37 |
| -5                    | 3,294           | 64  | 2,924          | 60  | 370               | 88  | 1,343           | 87  | 691            | 49  | 652    | 100 | 1,838              | 28 | 1,173          | 22 | 665    | 36 |
| -4                    | 3,503           | 62  | 3,009          | 59  | 494               | 86  | 1,432           | 87  | 836            | 56  | 595    | 103 | 1,921              | 27 | 1,230          | 24 | 691    | 36 |
| -3                    | 3,691           | 61  | 2,961          | 54  | 730               | 81  | 1,394           | 78  | 892            | 68  | 502    | 103 | 1,999              | 25 | 1,238          | 22 | 761    | 34 |
| -2                    | 3,821           | 56  | 3,070          | 57  | 751               | 80  | 1,572           | 79  | 839            | 58  | 733    | 98  | 2,106              | 26 | 1,260          | 23 | 846    | 34 |
| -1                    | 4,784           | 73  | 3,225          | 60  | 1,559             | 94  | 2,532           | 170 | 851            | 66  | 1,681  | 182 | 2,270              | 28 | 1,297          | 24 | 972    | 37 |
| 1                     | 5,905           | 93  | 3,297          | 58  | 2,608             | 110 | 4,611           | 157 | 1,018          | 73  | 3,593  | 173 | 3,212              | 33 | 1,320          | 24 | 1,892  | 41 |
| 2                     | 4,991           | 87  | 3,376          | 61  | 1,615             | 106 | 2,003           | 94  | 945            | 67  | 1,058  | 115 | 2,991              | 36 | 1,319          | 25 | 1,672  | 44 |
| 3                     | 4,860           | 95  | 3,361          | 67  | 1,499             | 116 | 2,109           | 100 | 1,031          | 60  | 1,078  | 117 | 2,944              | 36 | 1,302          | 27 | 1,643  | 45 |
| 4                     | 4,759           | 103 | 3,387          | 86  | 1,372             | 135 | 1,909           | 91  | 965            | 61  | 943    | 111 | 2,940              | 39 | 1,290          | 27 | 1,650  | 48 |
| 5                     | 4,787           | 119 | 3,217          | 72  | 1,570             | 141 | 2,064           | 116 | 1,060          | 75  | 1,003  | 140 | 2,995              | 46 | 1,272          | 29 | 1,723  | 55 |
| 6                     | 4,789           | 120 | 3,257          | 86  | 1,532             | 149 | 1,998           | 131 | 1,075          | 120 | 923    | 178 | 3,089              | 56 | 1,266          | 38 | 1,823  | 68 |
| 7                     | 5,031           | 151 | 3,425          | 115 | 1,606             | 191 | 2,613           | 291 | 1,250          | 133 | 1,363  | 328 | 3,107              | 62 | 1,244          | 49 | 1,863  | 80 |
| 8                     | 4,934           | 198 | 3,286          | 119 | 1,648             | 236 | 2,624           | 312 | 1,384          | 260 | 1,241  | 410 | 3,174              | 74 | 1,246          | 48 | 1,928  | 89 |
| 9                     | 4,813           | 198 | 3,267          | 163 | 1,546             | 258 | 2,661           | 273 | 1,055          | 131 | 1,606  | 311 | 3,226              | 92 | 1,204          | 60 | 2,021  | ## |
| 10                    | 5,314           | 346 | 3,438          | 261 | 1,876             | 439 | 3,148           | 531 | 1,061          | 187 | 2,087  | 582 | 3,423              | ## | 1,189          | 93 | 2,234  | ## |
| Annual Average        |                 |     |                |     |                   |     |                 |     |                |     |        |     |                    |    |                |    |        |    |
| Before the index date | 3,328           |     | 2,792          |     | 536               |     | 1,396           |     | 755            |     | 641    |     | 1,775              |    | 1,138          |    | 637    |    |
| After the index date  | 5,018           |     | 3,331          |     | 1,687             |     | 2,574           |     | 1,084          |     | 1,490  |     | 3,110              |    | 1,265          |    | 1,845  |    |
| Difference            | 1,691           |     | 539            |     | 1,151             |     | 1,178           |     | 329            |     | 849    |     | 1,336              |    | 127            |    | 1,208  |    |
| Ratio                 | 1.5             |     | 1.2            |     | 3.1               |     | 1.8             |     | 1.4            |     | 2.3    |     | 1.8                |    | 1.1            |    | 2.9    |    |

**Notes:** Diabetes Cohort: The follow-up Year 1 *includes* outpatient or inpatient expenditures on diagnosis day.

Control Cohort: People not diagnosed with diabetes *in the year of case-control matching*.

## SUPPLEMENTARY DATA

When the outpatient or inpatient costs on diagnosis day were excluded (as in Sensitivity analysis I), the estimated medical and corresponding excess expenditures (SE) for Diabetes cohort in the follow-up year 1 were; outpatient care: \$5,792 (93) and \$2,495 (\$110), and inpatient care: \$3,400 (136) and \$2,381(\$154).

Excess= Average expenditures for diabetes cohort – average expenditures for control cohort. %= Percent more for diabetes cohort compared to control cohort. SE=standard error around the mean. The excess expenditures are all statically significant ( $p < 0.05$ , paired Student t-test).

SUPPLEMENTARY DATA

Supplementary Table 5b. Sensitivity Analysis II: Estimated per capita total excess medical expenditures by age group and follow-up years before and after the index date (2013\$).

| Follow-up Year        | Aged: 25-44 Years |       |         |     |                   |       | Aged: 45-54 Years |     |         |     |        |       | Aged: 55-64 Years |       |         |       |                     |       |
|-----------------------|-------------------|-------|---------|-----|-------------------|-------|-------------------|-----|---------|-----|--------|-------|-------------------|-------|---------|-------|---------------------|-------|
|                       | Diabetes          |       | Control |     | Excess            |       | Diabetes          |     | Control |     | Excess |       | Diabetes          |       | Control |       | Excess              |       |
|                       | Cohort            | SE    | Cohort  | SE  | Cohort            | SE    | Cohort            | SE  | Cohort  | SE  | Cohort | SE    | Cohort            | SE    | Cohort  | SE    | Cohort              | SE    |
| -10                   | 3,743             | 826   | 2,933   | 810 | 809 <sup>NS</sup> | 1,157 | 4,404             | 320 | 3,084   | 206 | 1,320  | 381   | 5,100             | 357   | 4,322   | 311   | 777 <sup>NS</sup>   | 473   |
| -9                    | 3,574             | 336   | 3,395   | 384 | 179 <sup>NS</sup> | 510   | 4,113             | 192 | 3,344   | 204 | 768    | 280   | 6,668             | 387   | 4,198   | 162   | 2,470               | 420   |
| -8                    | 3,450             | 272   | 2,923   | 230 | 527 <sup>NS</sup> | 357   | 4,961             | 205 | 3,534   | 164 | 1,427  | 262   | 6,317             | 255   | 4,877   | 189   | 1,440               | 318   |
| -7                    | 4,060             | 278   | 3,472   | 317 | 589 <sup>NS</sup> | 422   | 5,282             | 180 | 3,673   | 140 | 1,609  | 228   | 6,620             | 213   | 5,322   | 212   | 1,297               | 301   |
| -6                    | 4,596             | 300   | 3,210   | 246 | 1,386             | 388   | 5,482             | 171 | 3,876   | 114 | 1,606  | 205   | 7,209             | 221   | 5,382   | 169   | 1,827               | 278   |
| -5                    | 4,806             | 251   | 3,654   | 237 | 1,153             | 346   | 6,047             | 169 | 4,024   | 95  | 2,023  | 194   | 7,514             | 226   | 5,946   | 195   | 1,568               | 299   |
| -4                    | 5,046             | 282   | 3,438   | 202 | 1,608             | 347   | 6,722             | 182 | 4,397   | 119 | 2,325  | 217   | 7,713             | 206   | 5,942   | 208   | 1,771               | 293   |
| -3                    | 4,983             | 206   | 3,478   | 192 | 1,505             | 281   | 6,873             | 148 | 4,664   | 113 | 2,209  | 186   | 8,396             | 249   | 6,234   | 190   | 2,162               | 313   |
| -2                    | 6,269             | 356   | 3,646   | 184 | 2,623             | 401   | 7,221             | 135 | 4,989   | 132 | 2,231  | 189   | 8,725             | 235   | 6,627   | 243   | 2,098               | 338   |
| -1                    | 7,132             | 264   | 3,452   | 146 | 3,680             | 302   | 9,152             | 215 | 5,045   | 107 | 4,106  | 240   | 11,784            | 560   | 6,933   | 275   | 4,851               | 623   |
| 1                     | 11,522            | 486   | 3,746   | 195 | 7,776             | 523   | 13,213            | 245 | 5,276   | 121 | 7,937  | 273   | 15,951            | 512   | 7,007   | 247   | 8,945               | 568   |
| 2                     | 7,947             | 270   | 4,132   | 260 | 3,816             | 375   | 9,894             | 195 | 5,410   | 148 | 4,484  | 245   | 11,269            | 338   | 7,478   | 337   | 3,790               | 478   |
| 3                     | 8,111             | 306   | 3,997   | 192 | 4,114             | 363   | 10,137            | 225 | 5,482   | 126 | 4,655  | 259   | 10,544            | 341   | 6,935   | 274   | 3,608               | 439   |
| 4                     | 8,289             | 359   | 4,139   | 214 | 4,149             | 420   | 9,779             | 225 | 5,566   | 140 | 4,213  | 267   | 10,165            | 357   | 7,041   | 327   | 3,124               | 485   |
| 5                     | 8,615             | 379   | 3,908   | 206 | 4,706             | 434   | 10,044            | 264 | 5,674   | 159 | 4,370  | 312   | 10,393            | 499   | 6,891   | 339   | 3,502               | 610   |
| 6                     | 9,308             | 577   | 4,127   | 230 | 5,181             | 627   | 9,859             | 251 | 5,664   | 180 | 4,195  | 312   | 10,819            | 620   | 7,950   | 800   | 2,869               | 1,004 |
| 7                     | 9,483             | 660   | 4,315   | 290 | 5,169             | 729   | 11,311            | 469 | 6,269   | 290 | 5,042  | 561   | 9,359             | 770   | 7,548   | 1,108 | 1,811 <sup>NS</sup> | 1,333 |
| 8                     | 10,634            | 1,232 | 4,092   | 307 | 6,542             | 1,291 | 10,810            | 401 | 6,344   | 411 | 4,466  | 574   | 9,887             | 1,357 | 6,770   | 988   | 3,117               | 1,698 |
| 9                     | 9,785             | 683   | 4,807   | 467 | 4,978             | 834   | 11,021            | 496 | 5,838   | 309 | 5,182  | 598   | 7,416             | 2,580 | 5,611   | 3,324 | 1,805 <sup>NS</sup> | 4,178 |
| 10                    | 10,614            | 1,171 | 5,125   | 827 | 5,489             | 1,446 | 12,344            | 930 | 5,902   | 427 | 6,442  | 1,058 |                   |       |         |       |                     |       |
| Annual average        |                   |       |         |     |                   |       |                   |     |         |     |        |       |                   |       |         |       |                     |       |
| Before the index date | 4,766             |       | 3,360   |     | 1,406             |       | 6,026             |     | 4,063   |     | 1,962  |       | 7,604             |       | 5,578   |       | 2,026               |       |
| After the index date  | 9,431             |       | 4,239   |     | 5,192             |       | 10,841            |     | 5,743   |     | 5,099  |       | 10,645            |       | 7,026   |       | 3,619               |       |
| Difference            | 4,665             |       | 879     |     | 3,786             |       | 4,816             |     | 1,679   |     | 3,136  |       | 3,040             |       | 1,447   |       | 1,593               |       |
| Ratio                 | 2.0               |       | 1.3     |     | 3.7               |       | 1.8               |     | 1.4     |     | 2.6    |       | 1.4               |       | 1.3     |       | 1.8                 |       |

**Notes:** Diabetes Cohort: The follow-up Year 1 *includes* outpatient or inpatient expenditures on diagnosis day.

Control Cohort: People not diagnosed with diabetes *in the year of case-control matching*.

## SUPPLEMENTARY DATA

When the outpatient or inpatient costs on diagnosis day were excluded (as in Sensitivity analysis I), the estimated medical and corresponding excess expenditures (SE) for Diabetes cohort in the follow-up year 1 were; Aged 25-44 Years: \$10,579 (457) and \$6,833 (\$479), Aged 45-54 Years: \$11,947 (218) and \$6,667 (\$250), Aged 45-54 Years: \$14,314 (469) and \$7,307 (\$530).

Excess= Average expenditures for diabetes cohort – average expenditures for control cohort. %= Percent more for diabetes cohort compared to control cohort. SE=standard error around the mean. The excess expenditures are all statically significant ( $p < 0.05$ , paired Student t-test).



SUPPLEMENTARY DATA

Supplementary Table 6b. Sensitivity Analysis II: Estimated per capita total excess medical expenditures by sex and follow-up years before and after the index date (\$2013).

| Follow-up Year        | Males    |       |         |     |        |       | Females  |     |         |     |                   |     |
|-----------------------|----------|-------|---------|-----|--------|-------|----------|-----|---------|-----|-------------------|-----|
|                       | Diabetes | SE    | Control | SE  | Excess | SE    | Diabetes | SE  | Control | SE  | Excess            | SE  |
|                       | Cohort   |       | Cohort  |     | Cohort |       | Cohort   |     | Cohort  |     | Cohort            |     |
| -10                   | 4,078    | 347   | 3,133   | 237 | 945    | 420   | 5,349    | 322 | 4,646   | 289 | 703 <sup>NS</sup> | 432 |
| -9                    | 4,744    | 299   | 3,019   | 164 | 1,725  | 341   | 5,998    | 311 | 4,751   | 197 | 1,247             | 369 |
| -8                    | 4,490    | 166   | 3,408   | 151 | 1,082  | 224   | 6,423    | 254 | 5,303   | 203 | 1,121             | 325 |
| -7                    | 4,909    | 182   | 3,592   | 147 | 1,317  | 234   | 6,617    | 184 | 5,187   | 173 | 1,430             | 253 |
| -6                    | 5,122    | 164   | 3,983   | 194 | 1,139  | 254   | 7,080    | 194 | 5,529   | 156 | 1,550             | 249 |
| -5                    | 5,591    | 174   | 3,846   | 115 | 1,744  | 209   | 7,327    | 179 | 5,709   | 140 | 1,618             | 228 |
| -4                    | 6,075    | 189   | 4,115   | 128 | 1,960  | 228   | 7,604    | 164 | 6,009   | 147 | 1,594             | 220 |
| -3                    | 6,239    | 161   | 4,213   | 147 | 2,026  | 218   | 7,893    | 167 | 5,925   | 138 | 1,968             | 217 |
| -2                    | 6,741    | 177   | 4,391   | 150 | 2,351  | 232   | 8,227    | 148 | 5,936   | 124 | 2,291             | 193 |
| -1                    | 8,861    | 325   | 4,497   | 123 | 4,364  | 348   | 10,256   | 248 | 6,219   | 184 | 4,037             | 309 |
| 1                     | 13,390   | 330   | 4,695   | 136 | 8,694  | 357   | 13,979   | 273 | 6,542   | 169 | 7,437             | 321 |
| 2                     | 9,322    | 222   | 5,022   | 148 | 4,301  | 267   | 10,431   | 207 | 6,235   | 153 | 4,196             | 257 |
| 3                     | 9,130    | 246   | 5,035   | 145 | 4,095  | 287   | 10,429   | 220 | 6,318   | 158 | 4,112             | 271 |
| 4                     | 8,636    | 210   | 4,817   | 143 | 3,818  | 256   | 10,280   | 261 | 6,425   | 198 | 3,855             | 329 |
| 5                     | 8,810    | 250   | 4,827   | 168 | 3,983  | 305   | 10,521   | 315 | 6,215   | 189 | 4,306             | 371 |
| 6                     | 8,917    | 276   | 4,844   | 233 | 4,073  | 364   | 10,407   | 333 | 6,331   | 267 | 4,076             | 429 |
| 7                     | 9,609    | 521   | 5,735   | 373 | 3,874  | 649   | 11,335   | 501 | 6,091   | 237 | 5,244             | 565 |
| 8                     | 10,204   | 497   | 5,586   | 537 | 4,617  | 731   | 10,632   | 648 | 6,224   | 340 | 4,408             | 747 |
| 9                     | 10,365   | 575   | 5,236   | 374 | 5,128  | 701   | 10,070   | 571 | 5,800   | 344 | 4,270             | 678 |
| 10                    | 11,861   | 1,305 | 5,735   | 603 | 6,126  | 1,481 | 10,135   | 723 | 5,643   | 480 | 4,492             | 883 |
| Annual average        |          |       |         |     |        |       |          |     |         |     |                   |     |
| Before the index date | 5,685    |       | 3,820   |     | 1,865  |       | 7,277    |     | 5,521   |     | 1,756             |     |
| After the index date  | 10,024   |       | 5,153   |     | 4,871  |       | 10,822   |     | 6,182   |     | 4,639             |     |
| Difference            | 4,339    |       | 1,334   |     | 3,006  |       | 3,544    |     | 661     |     | 2,883             |     |
| Ratio                 | 1.8      |       | 1.3     |     | 2.6    |       | 1.5      |     | 1.1     |     | 2.6               |     |

**Notes:**

Diabetes Cohort: The follow-up Year 1 *includes* outpatient or inpatient expenditures on diagnosis day.

Control Cohort: People not diagnosed with diabetes *in the year of case-control matching*.

When the outpatient or inpatient costs on diagnosis day were excluded (as in Sensitivity analysis I), the estimated medical and corresponding excess expenditures (SE) for Diabetes cohort in the follow-up year 1 were; Males: \$11,962 (305) and \$7,267 (\$334), Females: \$12,755 (242) and \$6,213 (\$296).

Excess= Average expenditures for diabetes cohort – average expenditures for control cohort. %= Percent more for diabetes cohort compared to control cohort. SE=standard error around the mean. The excess expenditures are all statically significant (p<0.05, paired Student t-test).
